# Supplementary material for: Triage tests for identifying atrial fibrillation in primary care: a diagnostic accuracy study comparing single-lead ECG and modified BP monitors
Source: PubMed Central journal article supplement — BMJ Open. 2014 Apr 30;4(5):e004565. doi: 10.1136/bmjopen-2013-004565 (PMC4025411; doi:10.1136/bmjopen-2013-004565), 2014-04-30
Supplement: bmjopen-2013-004565.draft_revisions.pdf [file bmjopen-2013-004565.draft_revisions.pdf]

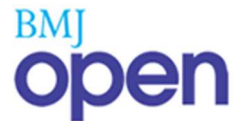

**Triage tests for identifying atrial fibrillation in primary care:  
a diagnostic accuracy study comparing single lead ECG and  
modified BP monitors**

|                                    |                                                                                                                                                                                                                                                                                                                                                                                                                                                                                                                                                                         |
|------------------------------------|-------------------------------------------------------------------------------------------------------------------------------------------------------------------------------------------------------------------------------------------------------------------------------------------------------------------------------------------------------------------------------------------------------------------------------------------------------------------------------------------------------------------------------------------------------------------------|
| Journal:                           | <i>BMJ Open</i>                                                                                                                                                                                                                                                                                                                                                                                                                                                                                                                                                         |
| Manuscript ID:                     | bmjopen-2013-004565                                                                                                                                                                                                                                                                                                                                                                                                                                                                                                                                                     |
| Article Type:                      | Research                                                                                                                                                                                                                                                                                                                                                                                                                                                                                                                                                                |
| Date Submitted by the Author:      | 27-Nov-2013                                                                                                                                                                                                                                                                                                                                                                                                                                                                                                                                                             |
| Complete List of Authors:          | Kearley, Karen; Oxford University, Primary Health Care<br>Selwood, Mary; University of Oxford, Primary Care Health Sciences<br>van den Bruel, Ann; University of Oxford, Dept of Primary Health Care<br>Thompson, Matthew; Oxford University, Department of Primary Care<br>Health Sciences<br>Mant, David; University of Oxford, Primary Health Care<br>Hobbs, Richard; University of Oxford, Dept of Primary Health Care<br>Fitzmaurice, DA; University of Birmingham, Primary Care and General<br>Practice<br>Heneghan, Carl; Oxford University, Primary Health Care |
| <b>Primary Subject<br>Heading</b>: | Diagnostics                                                                                                                                                                                                                                                                                                                                                                                                                                                                                                                                                             |
| Secondary Subject Heading:         | Cardiovascular medicine, Diagnostics, General practice / Family practice                                                                                                                                                                                                                                                                                                                                                                                                                                                                                                |
| Keywords:                          | Adult cardiology < CARDIOLOGY, PRIMARY CARE, STROKE MEDICINE                                                                                                                                                                                                                                                                                                                                                                                                                                                                                                            |
|                                    |                                                                                                                                                                                                                                                                                                                                                                                                                                                                                                                                                                         |

SCHOLARONE™  
Manuscripts

only

1  
2  
3 **Triage tests for identifying atrial fibrillation in primary care: a diagnostic accuracy study comparing**  
4 **single lead ECG and modified BP monitors**

5  
6 Karen Kearley<sup>1</sup>, Mary Selwood<sup>1</sup>, Ann Van den Bruel<sup>1</sup>, Matthew Thompson<sup>1</sup>, David Mant<sup>1</sup>, Richard  
7 Hobbs<sup>1</sup>, David Fitzmaurice<sup>2</sup>, Carl Heneghan<sup>1</sup>.

8  
9 Karen Kearley Clinical Scientist, Mary Selwood Research Nurse, Ann Van den Bruel Clinical Lecturer,  
10 Matthew Thompson Clinical Reader, David Mant Professor, Richard Hobbs Head of Primary Care  
11 Health Sciences , Carl Heneghan Clinical Reader

12  
13 <sup>1</sup>Department of Primary Care Health Sciences, University of Oxford, New Radcliffe House, 2nd floor,  
14 Walton Street, Jericho, OX2 6NW, UK

15  
16 <sup>2</sup>Primary Care Clinical Sciences, University of Birmingham, Edgbaston, B15 2TT, Fitzmaurice D  
17 Professor,

18  
19 Correspondence to: Karen.kearley@phc.ox.ac.uk

20  
21 **Support:** This publication presents independent research funded by the National Institute for Health  
22 Research (NIHR) under its Programme Grants for Applied Research funding scheme (RP-PG-0407-  
23 10347) and the NIHR School for Primary Care Research. The views expressed in this publication are  
24 those of the author(s) and not necessarily those of the NHS, the NIHR or the Department of Health.

25  
26 **Prior presentations:** *Society of Academic Primary Care Conference* November 2012 (Glasgow) and  
27 July 2013 (Nottingham), and *North American Primary Care Research Group* (Ottawa, 2013).

28  
29 *Word Count: 2789*

30  
31 *Numbers of tables: 3*

32  
33 *Numbers of figures: 3*  
34  
35  
36  
37  
38  
39  
40  
41  
42  
43  
44  
45  
46  
47  
48  
49  
50  
51  
52  
53  
54  
55  
56  
57  
58  
59  
60

## Abstract

**Objectives:** New electronic devices offer an opportunity within routine primary care settings for improving the detection of atrial fibrillation (AF), which is a common cardiac arrhythmia and a modifiable risk factor for stroke. We aimed to assess the performance of a modified blood pressure monitor and two single-lead ECG devices, as diagnostic triage tests for the detection of AF.

**Setting:** Six General Practices in the United Kingdom

**Participants:** 1000 ambulatory patients aged 75 years and over

**Primary and secondary outcome measures:** Comparative diagnostic accuracy of nurse pulse palpation, modified blood pressure monitor and single-lead ECG devices, compared to reference standard of 12-lead ECG, independently interpreted by cardiologists.

**Results:** A total of 79 participants (7.9%) had AF diagnosed by 12-lead ECG. All three devices had a high sensitivity (93.9-98.7%) and are useful for ruling out AF. WatchBP is a better triage test than Omron autoanalysis because it is more specific - 89.7% (95% CI 87.5-91.6) compared to 78.3% (95% CI 73.0-82.9) respectively. This would translate into a lower follow-on ECG rate of 17% to rule in/rule out AF compared to 29.7% with the Omron text message in the study population. The overall specificity of single-lead ECGs analysed by a cardiologist was 94.6% for Omron and 90.1% for Merlin.

**Conclusions:** WatchBP performs better as a triage test for identifying AF in primary care than the single-lead ECG monitors as it does not require expertise for interpretation and its diagnostic performance is comparable to single-lead ECG analysis by cardiologists. It could be used opportunistically to screen elderly patients for undiagnosed AF at regular intervals and/or during BP measurement.

**Trial Registration** – not required.

## Strengths and Limitations of this study

### *Strengths*

- Three devices for detecting atrial fibrillation were tested on an unselected elderly primary care population of 1000 individuals.
- The prevalence of AF expected for this setting, which allowed us to determine the operating characteristics of each monitor with precision.
- Our population is generalisable to similar primary care settings worldwide.
- A reference standard (12 lead ECG) was performed on all patients, and interpreted blindly by cardiologists.

### *Limitations:*

- The specificity of one cardiologist was substantially lower than the other three.
- Only 12 new cases of atrial fibrillation were detected in this setting, which is as expected for a primary care population such as this

## Introduction

Atrial fibrillation is the most common cardiac arrhythmia; present in more than 10% of patients aged 75 years or over<sup>1,2</sup>, and it significantly increases morbidity and mortality.<sup>3</sup> The main significance of atrial fibrillation (AF) is as a major independent risk factor for stroke and thromboembolism,<sup>4</sup> particularly in older patients. A large evidence base supports the efficacy of oral anticoagulation in reducing AF stroke risk by two-thirds<sup>5</sup>. AF may be asymptomatic but can be identified by detecting a characteristic irregularity in pulse rhythm. Despite this, it was found to be undiagnosed in 3.8% of patients aged over 75 years in a large UK screening study<sup>6</sup>. Indeed, undiagnosed AF is associated with 3.8-6.1% of all strokes<sup>7,8</sup>. Given the importance of identifying stroke risk patients, the high prevalence of AF, and the effective prevention strategies, there is a strong case to consider screening for atrial fibrillation.

European guidelines for the management of AF recommend opportunistic pulse assessment by a primary-care practitioner with a follow-up electrocardiogram (ECG) for an irregular pulse, an approach which is more cost effective than systematic screening with a 12-lead ECG.<sup>6,9</sup> In primary care research studies the sensitivity of nurse pulse assessment is high, varying between studies from 87-97% although it has a lower specificity (70 to 81%) requiring one out of every three or four screened patients to have a follow-up ECG<sup>6,10,11</sup>. This is a significant additional workload and could be a barrier to widespread implementation of opportunistic screening. Although pulse examination is a simple screening technique for AF, its detection relies on a subjective assessment in a busy routine care setting, which may partly explain why AF remains undetected in many patients. Indeed the American Heart Association suggests there is a need to develop strategies to detect AF more effectively in individuals and populations.<sup>12</sup>

Several new electronic devices have the potential to be useful triage tests for AF and initial studies suggest these have higher specificity than pulse palpation, so could significantly reduce the need for confirmatory 12-lead ECGs - but none have been evaluated in a primary care settings<sup>13,14,15</sup>. The National Institute for Health and Clinical Excellence (NICE) has recently suggested that using a blood pressure monitor, WatchBP, which is modified to detect irregularity of pulse during BP measurement in the elderly, together with appropriate anticoagulation of those subsequently diagnosed with AF, has the potential to reduce the incidence of stroke<sup>16</sup>. As stroke is the third leading cause of global disease burden, this would have substantial economic and patient benefits worldwide<sup>16,17</sup>.

## Methods:

### *Study design*

1  
2  
3 An observational study comparing the accuracy of a modified BP monitor (WatchBP), and two single-  
4 lead ECG devices, one with an auto-analysis function (Omron) and one without (Merlin), with the  
5 reference standard of blinded cardiologist diagnosis of atrial fibrillation from a 12-lead ECG.  
6

### 7 *Participants*

8  
9 We recruited participants aged 75 years or over, living at home, from six general practices in the UK  
10 between May 2011 and October 2012. Having excluded patients with implanted pacemakers or  
11 defibrillators, those unable to give informed consent, or patients in whom the GP considered  
12 participation was inappropriate (e.g. terminal illness), all other patients over 75 were invited to take  
13 part until the sample size had been achieved (i.e. 1000 participants had been recruited). A diagnosis  
14 of AF recorded in the patient GP record was not used as part of the selection criteria. Consenting  
15 study participants identified from GP records and meeting the eligibility criteria attended a 30-  
16 minute appointment with a practice nurse for the testing procedure.  
17  
18  
19

### 20 *Test procedure*

21  
22 All participants received the tests in the same order, which were delivered by nine registered nurses  
23 working within the practices.  
24

25 Firstly, the nurse used WatchBP (Microlife, Switzerland) a modified oscillometric BP monitor which  
26 flashes when it detects an irregular pulse during automatic BP measurement.  
27

28 Secondly, the nurse then applied an Omron monitor (model HCG-801, Omron Healthcare Europe,  
29 The Netherlands) which involved placing one electrode on the bare chest wall 5 cm below the  
30 nipple, whilst the patient held the other electrode with the right index finger. The monitor records a  
31 single-lead ECG tracing, and displays a message indicating the presence of possible AF. The device's  
32 analysis algorithm includes several cardiac rhythms which could potentially be AF, including fast and  
33 irregular, slow and irregular, irregular and those where analysis impossible. The single-lead  
34 recording and text message were recorded and saved for later downloading and analysis.  
35

36 Thirdly, the nurse applied a Merlin ECG event recorder (Meditech Ltd, Hungary) which resembles a  
37 watch, on participants' left wrist. The participant covered the electrode on the face of the device  
38 with the palm of their right hand for 30 seconds. The recording, with no automated analysis, was  
39 saved to a computer for later downloading and analysis. Unlike the Omron, the Merlin monitor does  
40 not require removal of any clothing, making it possible for use in public settings, an advantage for  
41 participants experiencing an intermittent arrhythmia.  
42

43  
44 The nurse recorded the results of the WatchBP monitor and the Omron automated text message  
45 during the initial examination. Each single-lead ECG trace was sent for interpretation to two  
46 independent cardiologists after removing all clinical information and patient identification except for  
47 date of birth and the text message (Omron only).  
48

49 Participants were asked if they had experienced palpitations, racing, pounding, fluttering or irregular  
50 heartbeat in the previous 4 weeks.  
51

### 52 *The reference standard*

53  
54 A 12-lead ECG was performed on all participants at the end of the visit, using standard procedures.  
55 ECGs were independently interpreted by a panel of two cardiologists, blind to all patient identifiers,  
56 clinical details, results of triage tests, but not blind to study objectives. They were asked to classify  
57 the ECG as atrial fibrillation or atrial flutter (yes/no/don't know). A third cardiologist, also blind to  
58 any of the other study results, interpreted the ECG readings for which there was no consensus or if  
59  
60

1  
2  
3 both cardiologists were uncertain about the presence of AF. AF is defined as the absence of distinct  
4 'p' waves, an absolutely irregular RR interval and an atrial cycle length <200ms (300bpm) on a 12-  
5 lead ECG<sup>17</sup>.

6  
7 To cope with the workload, the task was divided between two separate pairs of cardiologists. All  
8 had completed cardiology specialist training of between five and six years. The third cardiologist,  
9 whose role was to resolve uncertainty and moderate disagreement, was a specialist electro-  
10 physiologist.

### 11 *Study power and analysis*

12  
13  
14 We anticipated that the overall prevalence of AF, including both new and prior diagnoses, would be  
15 10%. We therefore estimated that 1000 participants would be needed to provide sufficient precision  
16 to estimate the sensitivity of each device with a maximum 95% CI of +/-10%.

17  
18 We compared the accuracy of the WatchBP, Omron (text and tracing) and Merlin monitors, with a  
19 12-lead ECG for detection of AF. All inconclusive results were treated as positive in our analysis  
20 (because in the clinical situation these participants could not have AF ruled out and would need to  
21 have a 12-lead ECG). We calculated sensitivity, specificity, likelihood ratios and 95% confidence  
22 intervals for each test. Analyses for both single-lead ECGs were done per cardiologist and the results  
23 were subsequently combined using a random effects bivariate model calculating overall sensitivity  
24 and specificity<sup>19</sup>. We analysed the inter-observer agreement of whether the single lead ECG trace  
25 showed AF between the cardiologists within each pair together with the kappa value<sup>20</sup>.

26  
27 We performed subset analyses of the comparative accuracy in patients with and without existing  
28 diagnoses of AF (whether or not treated) recorded in GP records. In addition, we modelled a 2-stage  
29 screening process for AF by examining patients who were WatchBP flash positive and analysing the  
30 sensitivity and specificity of the Omron autoanalysis in this subgroup.

31  
32 Data analysis was performed using Stata version 11S  
33  
34  
35  
36  
37  
38  
39  
40  
41  
42  
43  
44  
45  
46  
47  
48  
49  
50  
51  
52  
53  
54  
55  
56  
57  
58  
59  
60

## Results

Of 6529 potentially eligible patients, we invited 2673 for a screening visit; no further invitations were sent after the required 1000 sample had been achieved (Figure 1). Participants had an average age of 79.7 years (range 75.1 to 99.8 years), 49.3% were male (Table 1). 110 had AF recorded in the medical summary (11.0%), of whom 67 (67/110, 61%) had evidence of AF on their 12-lead ECG at the study visit. AF was noted in a further 12 participants based on the 12-lead ECG (1.2%). The three cardiologists could not reach a consensus about whether AF was present in the 12-lead ECG in one participant, who was therefore excluded from further analyses which are therefore based on 999 participants.

Overall, 50 (5.0%) participants reported having experienced palpitations, racing, pounding, fluttering or irregular heartbeat during the previous four weeks. Of these, 16 were already known, and three were new cases of AF. The inter-observer agreement for the 12-lead ECGs was good for both pairs of cardiologists; the kappa was 0.69 and 0.96 respectively for pair 1 and pair 2.

### **Accuracy of WatchBP and Omron autoanalysis**

Both WatchBP and Omron autoanalysis were highly sensitive (94.9% and 98.7%, respectively) (Table 2). The specificity of WatchBP was 89.7% (95% CI 87.5-91.6) whereas the Omron text message was lower at 76.2% (95%CI 73.3-78.9).

The higher specificity of WatchBP would translate into a markedly lower follow-on ECG rate of 17% to rule in/rule out AF compared to 29.7% with the Omron text message. The superior sensitivity of the Omron text message means the false negative rate is lower than with Watch BP (0.1% vs 0.4%).

The prevalence of AF was 1.4% (11) in the subset of 889 participants who did not have AF recorded on their medical summary. WatchBP and the Omron autoanalysis provided very similar sensitivity and specificity to the total study population and this translated to a follow-on ECG rate of 11% for WatchBP and 24% for the Omron text message. Of these follow on ECGs, 12% would be true positives for the WatchBP flash compared to 5% for the Omron text message.

We modelled a two stage screening process within our total sample, where patients who had a positive result with WatchBP went on to have the Omron autoanalysis. In participants who screened positive using the WatchBP, the sensitivity and specificity of the Omron autoanalysis was 100% (95%CI 95.2-100) and 35.8% (95% CI 26.2-46.3) respectively. This would slightly reduce the follow-on 12-lead ECG requirement from 17% to 13.6%.

### **Accuracy of Omron and Merlin single-lead ECGs interpreted by a cardiologist**

The diagnostic accuracy of the Omron and Merlin single-lead ECGs is shown in figure 3; meta-analysis of the four cardiologist's interpretations gave Omron a summary sensitivity of 94.4% with a summary specificity of 94.6%; Merlin had a summary sensitivity of 93.9% with a summary specificity of 90.1%. Cardiologist variability in single-lead ECG analysis is shown in Table 3. There was fair interobserver agreement (kappa 0.36 and 0.28 for Omron and Merlin respectively) between cardiologist pair 1, and good interobserver agreement (kappa 0.76 for both devices) between the second pair. The cardiologists were unable to interpret whether the trace showed AF on 0-1.2% of patients using Omron and 0-7.2% of occasions using Merlin.



## Discussion

### *Summary of main results*

Our results show that all the methods that we tested have a high sensitivity for detecting AF in an elderly primary care population and thus are useful for ruling out AF. During the study we detected 12 new cases of AF and 7.9% of the study population overall were experiencing AF at the time of the study consultation. The total prevalence in the study sample was 11%, as some patients have paroxysmal AF and were not experiencing arrhythmias at the time of the study.

WatchBP outperformed Omron autoanalysis because it is more specific – 89.7% compared to 76.2% and 78.3% respectively. The specificity of the single-lead ECGs when interpreted by a cardiologist were comparable with WatchBP. Overall Omron produced fewer inconclusive results and achieved slightly better specificity than Merlin. However cardiologist interpretation of the ECG trace was a more powerful factor in determining specificity than the type of monitor used. In this study, operator variability in ECG analysis was partly due to differences in expertise, and partly due to trade-offs made by different cardiologists between sensitivity and specificity.

In our elderly population, only 5% of patients reported experiencing palpitations. Amongst patients who did report palpitations, prevalence of AF was 36%. Most of these patients already had a diagnosis of AF.

### *Strengths and weakness*

The devices were tested on an unselected elderly primary care population. Although our sample did not include the housebound or patients with dementia, we recruited a large population with a prevalence of AF expected for this setting, which allowed us to determine the operating characteristics of each monitor with precision. We believe our population is generalisable to similar primary care settings worldwide.

The cardiologists analysed ECG recordings in line with recommended practice and all had a minimum of 5 years cardiology specialist training. The specificity of one cardiologist was substantially lower than the other three. Further research with a larger sample of cardiologists would be required to more fully interpret this finding. However, we do not believe this diminishes the reliability of our reference standard since the second pair of blinded cardiologists achieved extremely high concordance, and the moderating consultant cardiologist was a specialist electrophysiologist.

### *Comparison with existing literature*

The operating characteristics of WatchBP in this elderly primary care population are comparable to previous studies undertaken in different populations. In a US study of 405 patients attending a cardiology outpatients where 39% of the sample had an abnormal ECG (AF prevalence 23%) it had a sensitivity of 95% (95% CI 93-98) and specificity of 86% (95% CI 84-89) while in a Greek study of a diverse group of 73 individuals (healthy volunteers, outpatients, and inpatients) it had similar sensitivity of 93% (95% CI 74-99) and specificity of 89% (95% CI 79-96).

Omron has been evaluated in a German study of 505 patients in a hospital setting where 66% of the sample had an abnormal ECG (mean age 61 years, 66% male, AF prevalence 28%) with all analyses (including the reference standard) being undertaken by a single cardiologist. This study reported higher accuracy than we demonstrated, with a sensitivity of 99% (95%CI 96-100) and specificity of 96% (95% CI 94-98) for AF. We are unaware of any AF validation studies for Merlin.



### *Clinical implications*

Our study supports the recent NICE recommendation that GPs should consider using WatchBP for elderly patients who have a BP measurement in order to opportunistically identify undiagnosed AF. Specificity is comparable with a single-lead ECG analysed by a cardiologist and the result does not require specialist interpretation, which is an advantage over the single-lead ECG monitors and keeps screening straightforward and costs low. It is easily portable for use in housebound patients.

Prior to wider implementation, clinicians need to consider the optimal screening frequency. Assuming a primary care population in which the majority of AF cases had already been identified, the WatchBP would indicate a 'positive flash' for 1 in 10 patients who would thus require a follow-up 12-lead ECG. As some patients have their blood pressure measured frequently, there is potential for recurrent false-positive results and a high demand for 12-lead ECGs. These issues should be addressed to ensure sustainable implementation in primary care.

Paroxysmal AF presents a particular diagnostic challenge because patients may not be experiencing an arrhythmia when they are being screened with one-off measures. The potential for patients to undertake self-monitoring and to capture an ECG tracing when an arrhythmia is occurring are desirable features of an AF screening method. In our study, only 5% of patients reported experiencing palpitations, which would limit the usefulness of asking patients to record a single-lead ECG at the time of symptoms. Amongst the patients who did report palpitations, the prevalence of AF was 36%, but most of these patients already had a diagnosis of AF which might have improved their awareness of an arrhythmia.

WatchBP will not identify atrial flutter, which is also a risk factor for stroke. The prevalence of this is much lower than AF; in our study it was 0.4%.

### *Future research*

Screening for AF is not yet routine practice in primary care, therefore determining not only the optimal device, but the most appropriate and cost effective process is a priority. This could include an impact analysis using WatchBP as a triage test to evaluate its effectiveness (and cost effectiveness) for improving the detection of AF and prevention of stroke.

### *Conclusion*

WatchBP performs better than the single-lead ECG monitors as a triage test for identifying AF in primary care as it does not require any expertise for interpretation and their diagnostic performance is comparable. It could be used to opportunistically screen elderly patients for undiagnosed AF at regular intervals and/or during BP measurement. It has advantages over pulse assessment because the result is objective and it also has a higher specificity, keeping follow-up 12-lead ECGs to a minimum.

### **Contribution of authors**

KK, MS, DM, RH, DF, CH initiated the study and designed the protocol. KK, MS, AV, MT, CH were involved in the conduct and analysis of the trial. MS oversaw data management and monitoring of protocol adherence throughout the trial. KK, AV, MT co-wrote the manuscript. MS, DM, CH, RH, DF contributed to writing the manuscript.

**Full ethical approval** was granted of the study by NRES Committee South Central – Oxford A.

### Competing interests

We received subsidised monitors from Microlife, Omron and Merlin for the submitted work; FDRH has received free or subsidised BP equipment from Omron and Microlife for other research and there are no other relationships or activities that could appear to have influenced the submitted work .

### Copyright

Crown copyright is claimed for this publication, in accordance with NIHR guidelines.

### References

1. NICE. Atrial Fibrillation: National clinical guideline for management in primary and secondary care. 2006.
2. Fitzmaurice DA, Hobbs FDR, Jowett S, Mant J, Murray E, Holder R et al. Screening versus routine practice for detection of atrial fibrillation in people aged 65 or over: cluster randomised controlled trial. *BMJ* 2007; 335:383-6.
3. Miyasaka Y, Barnes ME, Bailey KR, Cha SS, Gersh BJ, Seward JB, Tsang TS. Mortality trends in patients diagnosed with first atrial fibrillation – a 21-year community study. *J Am Coll Cardiol* 2007; 49:986-92.
4. Wolf PA, Abbott RD, Kannell WB. Atrial fibrillation as an independent risk factor for stroke: the Framingham study. *Stroke* 1991 Aug; 22(8):983-8.
5. Aguilar MI, Hart R. Oral anticoagulants for preventing stroke in patients with non-valvular atrial fibrillation and no previous history of stroke or transient ischemic attacks. *Cochrane Database of Systematic Reviews* 2005, Issue 3. Edited (no change to conclusions), published in Issue 1, 2009
6. Hobbs F, Fitzmaurice DA, Mant J, Murray E, Jowett S, Bryan S, et al. A randomised controlled trial and cost-effectiveness study of systematic screening (targeted and total population screening) versus routine practice for the detection of atrial fibrillation in people aged 65 and over. The SAFE study. *Health Technol Assess*. 2005 Oct; 9(40): 1-74.
7. Lin HJ, Wolf PA, Benjamin EJ, Belanger AJ, D'Agostino RB. Newly diagnosed atrial fibrillation and acute stroke. The Framingham Study. *Stroke* 1995;26:1527-30.
8. Liao J, Khalid Z, Scallan C, Morillo C, O'Donnell M. Noninvasive cardiac monitoring for detecting paroxysmal atrial fibrillation or flutter after acute ischemic stroke: a systematic review. *Stroke* 2007;38:
9. 2012 focused update of the ESC Guidelines for the management of atrial fibrillation. An update of the 2010 ESC Guidelines for the management of atrial fibrillation. *European Heart Journal* (2012) 33, 2719–2747
10. Sudlow M, Rodgers H, Kenny RA Thomson R. Identification of patients with atrial fibrillation in general practice: a study of screening methods. *British Medical Journal* 1998;317:327
11. Morgan S, Mant D. Randomised trial of two approaches to screening for atrial fibrillation in UK general practice. *British Journal of General Practice*. 2002;52:373–380
12. Estes, N, Sacco R, Al-Khatib S, Ellinor P, Bezanson J, Alonso A, et al. American Heart Association Atrial Fibrillation Research Summit. *Circulation*. 2011 July 19; 124(3): 363–372
13. Wiesel J, Fitzig L, Herschman Y, Messineo F. Detection of atrial fibrillation using a modified microlife blood pressure monitor. *Am J Hypertens* 2009; 22(8): 848-852.
14. Stergiou G, Karpettas N, Protogerou A Nasothimiou EG, Kyriakidis M. Diagnostic accuracy of a home blood pressure monitor to detect atrial fibrillation. *Journal of Human Hypertension* (2009) 23, 654–65
15. Kaleschke G, Hoffman B, Drewitz I, Steinbeck G, Naebauer M, Goette A, et al. Prospective, multicentre validation of a simple, patient-operated electrocardiographic system for the

- 1  
2  
3 detection of arrhythmias and electrocardiographic changes. *Europace* (2009) 11 (10): 1362-  
4 1368
- 5 16. NICE. WatchBP Home A for opportunistically detecting atrial fibrillation during diagnosis and  
6 monitoring of hypertension, 2013
- 7 17. Lozano R, Naghavi M, Foreman K, Lim S, Shibuya K, Aboyans V et al. Global and regional  
8 mortality from 235 causes of death for 20 age groups in 1990 and 2010: A systematic analysis  
9 for the Global Burden of Disease Study 2010. *Lancet* 2012; 380:2095
- 10 18. Harris K, Edwards D, Mant J. How can we best detect atrial fibrillation? *J R Coll Physicians*  
11 2012;42 Suppl 18:5-22.
- 12 19. Macaskill P, Gatsonis C, Deeks J, Harbord R, Takwoingi Y. Chapter 10: Analysing and  
13 Presenting Results. In: Deeks JJ, Bossuyt PM, Gatsonis C (editors), *Cochrane Handbook for*  
14 *Systematic Reviews of Diagnostic Test Accuracy* Version 1.0. The Cochrane Collaboration,  
15 2010
- 16 20. Altman D. *Practical Statistics for Medical Research*. Chapman and Hall/CRC, 1991.
- 17  
18  
19  
20  
21  
22  
23  
24  
25  
26  
27  
28  
29  
30  
31  
32  
33  
34  
35  
36  
37  
38  
39  
40  
41  
42  
43  
44  
45  
46  
47  
48  
49  
50  
51  
52  
53  
54  
55  
56  
57  
58  
59  
60

**Table 1: Characteristics of participants included in diagnostic accuracy analyses**

|                                                    |                                                    |
|----------------------------------------------------|----------------------------------------------------|
| Total number of participants                       | 999                                                |
| Age (mean)                                         | 79.7 years (range 75.1-99.8)<br>(95% CI 79.4-79.9) |
| Gender % male                                      | 49.3 (95%CI 46.2-52.5)                             |
| Co-morbidities (from medical summary)              |                                                    |
| Atrial fibrillation                                | 110 (11%)                                          |
| Heart failure                                      | 31 (3.1%)                                          |
| Hypertension                                       | 533 (53.3%)                                        |
| Diabetes                                           | 122 (12.2%)                                        |
| Stroke                                             | 31 (3.1%)                                          |
| Transient ischaemic attack                         | 65 (6.5%)                                          |
| Participants with AF on anti-arrhythmic medication | 87(8.7%)                                           |

**Table 2: Diagnostic performance of WatchBP and Omron autoanalysis for detecting atrial fibrillation**

| n=999*<br>Prevalence 7.9% | WatchBP<br>with AF indicator flash<br>(95% CI) | Omron<br>autoanalysis*<br>(95%CI) |
|---------------------------|------------------------------------------------|-----------------------------------|
| Sensitivity %             | 94.9 (87.5-98.6)                               | 98.7(93.2-100 )                   |
| Specificity %             | 89.7 (87.5-91.6)                               | 76.2 (73.3-78.9)                  |
| Positive likelihood ratio | 9.2 (7.6-11.2)                                 | 4.15 (3.69-4.67)                  |
| Negative likelihood ratio | 0.057 (0.022-0.15)                             | 0.017 (0.0024-0.12)               |
| Positive predictive value | 44.1 (36.5-51.9)                               | 26.3 (21.3-31.7)                  |
| Negative predictive value | 99.5 (98.8-99.9)                               | 99.9 (99.2-100)                   |

\*text message 'irregular 'or 'analysis impossible' counted as positive test

Table 3: Diagnostic performance of Omron and Merlin single-lead ECGs for detecting atrial fibrillation

| n=999*<br>Prevalence 7.9%    | Interpretation         | Omron<br>single-lead ECG<br>(95% CI) | Merlin<br>single-lead ECG<br>(95% CI) |
|------------------------------|------------------------|--------------------------------------|---------------------------------------|
| Sensitivity %                | <i>Cardiologist: 1</i> | 95 (82-99)                           | 97 (85-100)                           |
|                              | 2                      | 95 (82-99)                           | 91 (77-98)                            |
|                              | 3                      | 90 (77-97)                           | 98 (87-100)                           |
|                              | 4                      | 98 (87-100)                          | 88 (74-96)                            |
| Specificity %                | <i>Cardiologist: 1</i> | 75 (71-79)                           | 76 (71-80)                            |
|                              | 2                      | 98 (96-99)                           | 95 (93-97)                            |
|                              | 3                      | 97 (96-99)                           | 92 (89-94)                            |
|                              | 4                      | 95 (92-97)                           | 91 (88-94)                            |
| Positive likelihood<br>ratio | <i>Cardiologist: 1</i> | 3.8 (3.2-4.6)                        | 3.99 (3.3-4.8)                        |
|                              | 2                      | 41.8 (22.5-77.5)                     | 18.8 (12.2-28.8)                      |
|                              | 3                      | 35.8 (20.3-63.1)                     | 11.5 (8.5-15.6)                       |
|                              | 4                      | 18.5 (12.6-27.2)                     | 10.1 (7.4-13.9)                       |
| Negative likelihood<br>ratio | <i>Cardiologist: 1</i> | 0.07 (0.02-0.28)                     | 0.04 (0.01-0.26)                      |
|                              | 2                      | 0.05 (0.01-0.21)                     | 0.09 (0.03-0.27)                      |
|                              | 3                      | 0.098 (0.04-0.25)                    | 0.03 (0.004-0.18)                     |
|                              | 4                      | 0.02 (0.004-0.17)                    | 0.13 (0.06-0.3)                       |
| Positive predictive<br>value | <i>Cardiologist: 1</i> | 24.1 (17.4-31.9)                     | 24.5 (17.6-32.5)                      |
|                              | 2                      | 77.8 (62.9-88.8)                     | 60.4 (46.0-73.5)                      |
|                              | 3                      | 76.0 (61.8-86.9)                     | 50.6 (39.3-61.9)                      |
|                              | 4                      | 62.1 (49.3-73.8)                     | 47.4 (36.0-59.1)                      |
| Negative predictive<br>value | <i>Cardiologist: 1</i> | 99.4 (97.9-99.9)                     | 99.7 (98.3-100)                       |
|                              | 2                      | 99.5 (98.3-99.9)                     | 99.3 (97.9-99.8)                      |
|                              | 3                      | 99.1 (97.8-99.8)                     | 99.8 (98.7-100)                       |
|                              | 4                      | 99.8 (98.8-100)                      | 98.9 (97.3-99.6)                      |

Figure 1: Patient recruitment flow chart

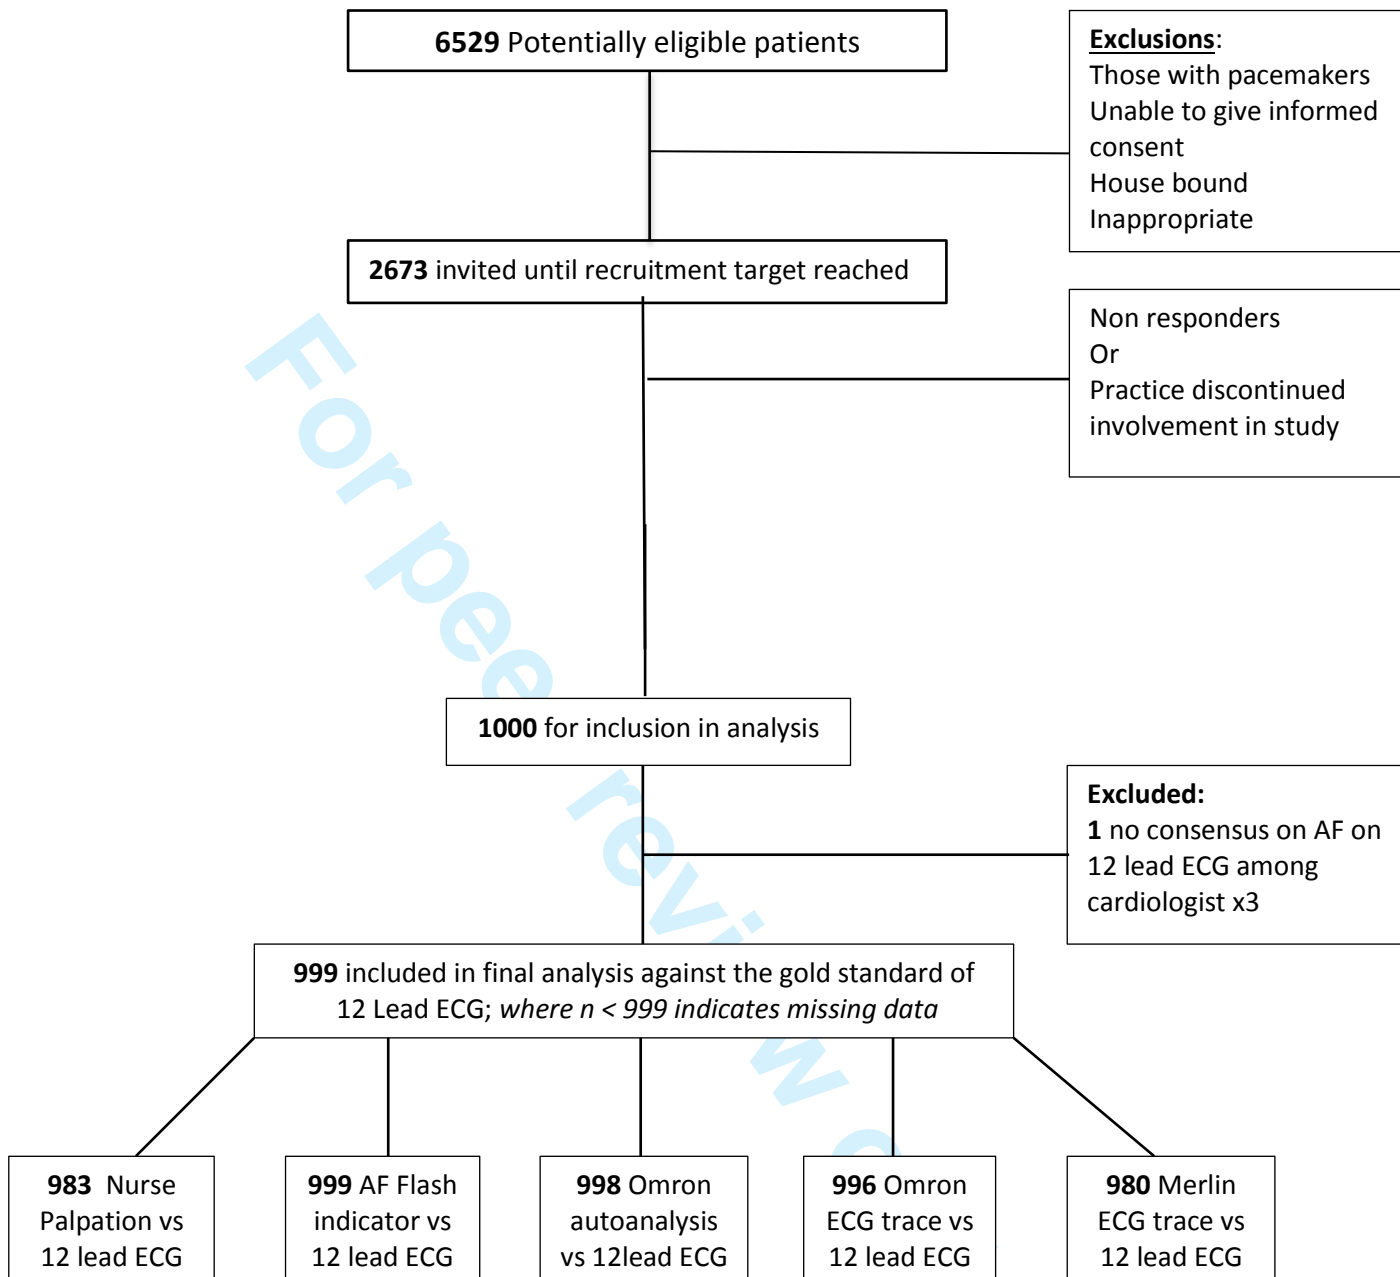

Figure 2: Predictive value of WatchBP and Omron autoanalysis for detecting AF

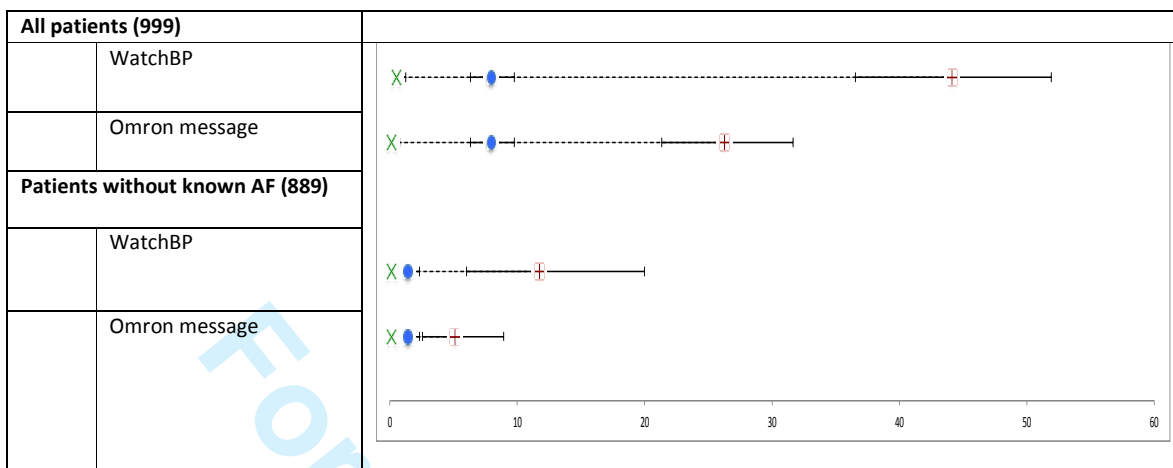

Blue dots = prevalence; red dots: probability of AF after a positive test; green dots: probability of AF after a negative test (each with their 95% CI)

Figure 3: Forest plot of diagnostic accuracy per cardiologist of Omron and Merlin single-lead ECGs

OMRON

| Study          | TP | FP  | FN | TN  | Sensitivity (95% CI) | Specificity (95% CI) | Sensitivity (95% CI) | Specificity (95% CI) |
|----------------|----|-----|----|-----|----------------------|----------------------|----------------------|----------------------|
| Cardiologist 1 | 35 | 110 | 2  | 332 | 0.95 [0.82, 0.99]    | 0.75 [0.71, 0.79]    | 0.95                 | 0.75                 |
| Cardiologist 2 | 35 | 10  | 2  | 432 | 0.95 [0.82, 0.99]    | 0.98 [0.96, 0.99]    | 0.95                 | 0.98                 |
| Cardiologist 3 | 38 | 12  | 4  | 463 | 0.90 [0.77, 0.97]    | 0.97 [0.96, 0.99]    | 0.90                 | 0.97                 |
| Cardiologist 4 | 41 | 25  | 1  | 450 | 0.98 [0.87, 1.00]    | 0.95 [0.92, 0.97]    | 0.98                 | 0.95                 |

MERLIN

| Study          | TP | FP  | FN | TN  | Sensitivity (95% CI) | Specificity (95% CI) | Sensitivity (95% CI) | Specificity (95% CI) |
|----------------|----|-----|----|-----|----------------------|----------------------|----------------------|----------------------|
| Cardiologist 1 | 34 | 105 | 1  | 326 | 0.97 [0.85, 1.00]    | 0.76 [0.71, 0.80]    | 0.97                 | 0.76                 |
| Cardiologist 2 | 32 | 21  | 3  | 410 | 0.91 [0.77, 0.98]    | 0.95 [0.93, 0.97]    | 0.91                 | 0.95                 |
| Cardiologist 3 | 41 | 40  | 1  | 432 | 0.98 [0.87, 1.00]    | 0.92 [0.89, 0.94]    | 0.98                 | 0.92                 |
| Cardiologist 4 | 37 | 41  | 5  | 431 | 0.88 [0.74, 0.96]    | 0.91 [0.88, 0.94]    | 0.88                 | 0.91                 |





**Triage tests for identifying atrial fibrillation in primary care:  
a diagnostic accuracy study comparing single lead ECG and  
modified BP monitors**

|                                    |                                                                                                                                                                                                                                                                                                                                                                                                                                                                                                                                                                         |
|------------------------------------|-------------------------------------------------------------------------------------------------------------------------------------------------------------------------------------------------------------------------------------------------------------------------------------------------------------------------------------------------------------------------------------------------------------------------------------------------------------------------------------------------------------------------------------------------------------------------|
| Journal:                           | <i>BMJ Open</i>                                                                                                                                                                                                                                                                                                                                                                                                                                                                                                                                                         |
| Manuscript ID:                     | bmjopen-2013-004565.R1                                                                                                                                                                                                                                                                                                                                                                                                                                                                                                                                                  |
| Article Type:                      | Research                                                                                                                                                                                                                                                                                                                                                                                                                                                                                                                                                                |
| Date Submitted by the Author:      | 10-Mar-2014                                                                                                                                                                                                                                                                                                                                                                                                                                                                                                                                                             |
| Complete List of Authors:          | Kearley, Karen; Oxford University, Primary Health Care<br>Selwood, Mary; University of Oxford, Primary Care Health Sciences<br>van den Bruel, Ann; University of Oxford, Dept of Primary Health Care<br>Thompson, Matthew; Oxford University, Department of Primary Care<br>Health Sciences<br>Mant, David; University of Oxford, Primary Health Care<br>Hobbs, Richard; University of Oxford, Dept of Primary Health Care<br>Fitzmaurice, DA; University of Birmingham, Primary Care and General<br>Practice<br>Heneghan, Carl; Oxford University, Primary Health Care |
| <b>Primary Subject<br>Heading</b>: | Diagnostics                                                                                                                                                                                                                                                                                                                                                                                                                                                                                                                                                             |
| Secondary Subject Heading:         | Cardiovascular medicine, Diagnostics, General practice / Family practice                                                                                                                                                                                                                                                                                                                                                                                                                                                                                                |
| Keywords:                          | Adult cardiology < CARDIOLOGY, PRIMARY CARE, STROKE MEDICINE                                                                                                                                                                                                                                                                                                                                                                                                                                                                                                            |
|                                    |                                                                                                                                                                                                                                                                                                                                                                                                                                                                                                                                                                         |

SCHOLARONE™  
Manuscripts

only

1  
2  
3 **Triage tests for identifying atrial fibrillation in primary care: a diagnostic accuracy study comparing**  
4 **single lead ECG and modified BP monitors**

5  
6 Karen Kearley<sup>1</sup>, Mary Selwood<sup>1</sup>, Ann Van den Bruel<sup>1</sup>, Matthew Thompson<sup>1,2</sup>, David Mant<sup>1</sup>, FD Richard  
7 Hobbs<sup>1</sup>, David Fitzmaurice<sup>3</sup>, Carl Heneghan<sup>1</sup>.

8  
9 Karen Kearley Clinical Scientist, Mary Selwood Research Nurse, Ann Van den Bruel Clinical Lecturer,  
10 Matthew Thompson Senior Clinical Researcher & Professor, David Mant Professor, Richard Hobbs  
11 Head of Primary Care Health Sciences , Carl Heneghan Professor

12  
13 <sup>1</sup>Nuffield Department of Primary Care Health Sciences, University of Oxford, New Radcliffe House,  
14 2nd floor, Walton Street, Jericho, OX2 6NW, UK

15  
16 <sup>2</sup>Department of Family Medicine, University of Washington, Seattle, WA 98195-4696

17  
18 <sup>3</sup>Primary Care Clinical Sciences, University of Birmingham, Edgbaston, B15 2TT, Fitzmaurice D  
19 Professor,

20  
21 Correspondence to: Matthew.Thompson@phc.ox.ac.uk

22  
23 **Support:** This publication presents independent research funded by the National Institute for Health  
24 Research (NIHR) under its Programme Grants for Applied Research funding scheme (RP-PG-0407-  
25 10347) and the NIHR School for Primary Care Research. The views expressed in this publication are  
26 those of the author(s) and not necessarily those of the NHS, the NIHR or the Department of Health.

27  
28 **Prior presentations:** *Society of Academic Primary Care Conference* November 2012 (Glasgow) and  
29 July 2013 (Nottingham), and *North American Primary Care Research Group* (Ottawa, 2013).

30  
31 *Word Count: 2789*

32  
33 *Numbers of tables: 3*

34  
35 *Numbers of figures: 3*  
36  
37  
38  
39  
40  
41  
42  
43  
44  
45  
46  
47  
48  
49  
50  
51  
52  
53  
54  
55  
56  
57  
58  
59  
60

## Abstract

**Objectives:** New electronic devices offer an opportunity within routine primary care settings for improving the detection of atrial fibrillation (AF), which is a common cardiac arrhythmia and a modifiable risk factor for stroke. We aimed to assess the performance of a modified blood pressure monitor and two single-lead ECG devices, as diagnostic triage tests for the detection of AF.

**Setting:** Six General Practices in the United Kingdom

**Participants:** 1000 ambulatory patients aged 75 years and over

**Primary and secondary outcome measures:** Comparative diagnostic accuracy of modified blood pressure monitor and single-lead ECG devices, compared to reference standard of 12-lead ECG, independently interpreted by cardiologists.

**Results:** A total of 79 participants (7.9%) had AF diagnosed by 12-lead ECG. All three devices had a high sensitivity (93.9-98.7%) and are useful for ruling out AF. WatchBP is a better triage test than Omron autoanalysis because it is more specific - 89.7% (95% CI 87.5-91.6) compared to 78.3% (95% CI 73.0-82.9) respectively. This would translate into a lower follow-on ECG rate of 17% to rule in/rule out AF compared to 29.7% with the Omron text message in the study population. The overall specificity of single-lead ECGs analysed by a cardiologist was 94.6% for Omron and 90.1% for Merlin.

**Conclusions:** WatchBP performs better as a triage test for identifying AF in primary care than the single-lead ECG monitors as it does not require expertise for interpretation and its diagnostic performance is comparable to single-lead ECG analysis by cardiologists. It could be used opportunistically to screen elderly patients for undiagnosed AF at regular intervals and/or during BP measurement.

**Trial Registration** – not required.

## Strengths and Limitations of this study

### *Strengths*

- Three devices for detecting atrial fibrillation were tested on an unselected elderly primary care population of 1000 individuals.
- The prevalence of AF expected for this setting, which allowed us to determine the operating characteristics of each monitor with precision.
- Our population is generalisable to similar primary care settings worldwide.
- A reference standard (12 lead ECG) was performed on all patients, and interpreted blindly by cardiologists.

### *Limitations:*

- The specificity of one cardiologist was substantially lower than the other three.
- Only 12 new cases of atrial fibrillation were detected in this setting, which is as expected for a primary care population such as this

## Introduction

Atrial fibrillation is the most common cardiac arrhythmia; present in more than 10% of patients aged 75 years or over<sup>1,2</sup>, and it significantly increases morbidity and mortality.<sup>3</sup> The main significance of atrial fibrillation (AF) is as a major independent risk factor for stroke and thromboembolism,<sup>4</sup> particularly in older patients. A large evidence base supports the efficacy of oral anticoagulation in reducing AF stroke risk by two-thirds<sup>5</sup>. AF may be asymptomatic but can be identified by detecting a characteristic irregularity in pulse rhythm. Despite this, it was found to be undiagnosed in 3.8% of patients aged over 75 years in a large UK screening study<sup>6</sup>. Indeed, undiagnosed AF is associated with 3.8-6.1% of all strokes<sup>7,8</sup>. Given the importance of identifying stroke risk patients, the high prevalence of AF, and the effective prevention strategies, there is a strong case to consider screening for atrial fibrillation.

European guidelines for the management of AF recommend opportunistic pulse assessment by a primary-care practitioner with a follow-up electrocardiogram (ECG) for an irregular pulse, an approach which is more cost effective than systematic screening with a 12-lead ECG.<sup>6,9</sup> In primary care research studies the sensitivity of nurse pulse assessment is high, varying between studies from 87-97% although it has a lower specificity (70 to 81%) requiring one out of every three or four screened patients to have a follow-up ECG<sup>6,10,11</sup>. This is a significant additional workload and could be a barrier to widespread implementation of opportunistic screening. Although pulse examination is a simple screening technique for AF, its detection relies on a subjective assessment in a busy routine care setting, which may partly explain why AF remains undetected in many patients. Indeed the American Heart Association suggests there is a need to develop strategies to detect AF more effectively in individuals and populations.<sup>12</sup>

Several new electronic devices have the potential to be useful triage tests for AF and initial studies suggest these have higher specificity than pulse palpation, so could significantly reduce the need for confirmatory 12-lead ECGs - but none have been evaluated in a primary care settings<sup>13,14,15</sup>. The National Institute for Health and Clinical Excellence (NICE) has recently suggested that using a blood pressure monitor, WatchBP, which is modified to detect irregularity of pulse during BP measurement in the elderly, together with appropriate anticoagulation of those subsequently diagnosed with AF, has the potential to reduce the incidence of stroke<sup>16</sup>. As stroke is the third leading cause of global disease burden, this would have substantial economic and patient benefits worldwide<sup>16,17</sup>.

## Methods:

### *Study design*

An observational study comparing the accuracy of a modified BP monitor (WatchBP), and two single-lead ECG devices, one with an auto-analysis function (Omron) and one without (Merlin), with the reference standard of blinded cardiologist diagnosis of atrial fibrillation from a 12-lead ECG.

### *Participants*

We recruited participants aged 75 years or over, living at home, from six general practices in the UK between May 2011 and October 2012. Having excluded patients with implanted pacemakers or defibrillators, those unable to give informed consent, or patients in whom the GP considered participation was inappropriate (e.g. terminal illness), all other patients over 75 were invited to take part until the sample size had been achieved (i.e. 1000 participants had been recruited). A diagnosis of AF recorded in the patient GP record was not used as part of the selection criteria. Consenting study participants identified from GP records and meeting the eligibility criteria attended a 30-minute appointment with a practice nurse for the testing procedure.

### *Test procedure*

All participants received the tests in the same order, which were delivered by nine registered nurses working within the practices.

Firstly, the nurse used WatchBP (Microlife, Switzerland) a modified oscillometric BP monitor which flashes when it detects an irregular pulse during automatic BP measurement.

Secondly, the nurse then applied an Omron monitor (model HCG-801, Omron Healthcare Europe, The Netherlands) which involved placing one electrode on the bare chest wall 5 cm below the nipple, whilst the patient held the other electrode with the right index finger. The monitor records a single-lead ECG tracing, and displays a message indicating the presence of possible AF. The device's analysis algorithm includes several cardiac rhythms which could potentially be AF, including fast and irregular, slow and irregular, irregular and those where analysis impossible. The single-lead recording and text message were recorded and saved for later downloading and analysis.

Thirdly, the nurse applied a Merlin ECG event recorder (Meditech Ltd, Hungary) which resembles a watch, on participants' left wrist. The participant covered the electrode on the face of the device with the palm of their right hand for 30 seconds. The recording, with no automated analysis, was saved to a computer for later downloading and analysis. Unlike the Omron, the Merlin monitor does not require removal of any clothing, making it possible for use in public settings, an advantage for participants experiencing an intermittent arrhythmia.

The nurse recorded the results of the WatchBP monitor and the Omron automated text message during the initial examination. Each single-lead ECG trace was sent for interpretation to two independent cardiologists after removing all clinical information and patient identification except for date of birth and the text message (Omron only).

Participants were asked if they had experienced palpitations, racing, pounding, fluttering or irregular heartbeat in the previous 4 weeks.

### *The reference standard*

A 12-lead ECG was performed on all participants at the end of the visit, using standard procedures. ECGs were independently interpreted by a panel of two cardiologists, blind to all patient identifiers, clinical details, results of triage tests, but not blind to study objectives. They were asked to classify the ECG as atrial fibrillation or atrial flutter (yes/no/don't know). A third cardiologist, also blind to any of the other study results, interpreted the ECG readings for which there was no consensus or if both cardiologists were uncertain about the presence of AF. AF is defined as the absence of distinct 'p' waves, an absolutely irregular RR interval and an atrial cycle length <200ms (300bpm) on a 12-lead ECG<sup>17</sup>.

To cope with the workload, the task was divided between two separate pairs of cardiologists. All had completed cardiology specialist training of between five and six years. The third cardiologist, whose role was to resolve uncertainty and moderate disagreement, was a specialist electro-physiologist.

### *Study power and analysis*

We anticipated that the overall prevalence of AF, including both new and prior diagnoses, would be 10%. We therefore estimated that 1000 participants would be needed to provide sufficient precision to estimate the sensitivity of each device with a maximum 95% CI of +/-10%.

We compared the accuracy of the WatchBP, Omron (text and tracing) and Merlin monitors, with a 12-lead ECG for detection of AF. All inconclusive results were treated as positive in our analysis

1  
2  
3 (because in the clinical situation these participants could not have AF ruled out and would need to  
4 have a 12-lead ECG). We calculated sensitivity, specificity, likelihood ratios and 95% confidence  
5 intervals for each test. Analyses for both single-lead ECGs were done per cardiologist and the results  
6 were subsequently combined using a random effects bivariate model calculating overall sensitivity  
7 and specificity<sup>19</sup>. We analysed the inter-observer agreement of whether the single lead ECG trace  
8 showed AF between the cardiologists within each pair together with the kappa value<sup>20</sup>.  
9

10 We performed subset analyses of the comparative accuracy in patients with and without existing  
11 diagnoses of AF (whether or not treated) recorded in GP records. In addition, we modelled a 2-stage  
12 screening process for AF by examining patients who were WatchBP flash positive and analysing the  
13 sensitivity and specificity of the Omron autoanalysis in this subgroup.  
14

15 Data analysis was performed using Stata version 11S  
16  
17  
18  
19  
20  
21  
22  
23  
24  
25  
26  
27  
28  
29  
30  
31  
32  
33  
34  
35  
36  
37  
38  
39  
40  
41  
42  
43  
44  
45  
46  
47  
48  
49  
50  
51  
52  
53  
54  
55  
56  
57  
58  
59  
60

## Results

Of 6529 potentially eligible patients, we invited 2673 for a screening visit; no further invitations were sent after the required 1000 sample had been achieved (Figure 1). Participants had an average age of 79.7 years (range 75.1 to 99.8 years), 49.3% were male (Table 1). 110 had AF recorded in the medical summary (11.0%), of whom 67 (67/110, 61%) had evidence of AF on their 12-lead ECG at the study visit. AF was noted in a further 12 participants based on the 12-lead ECG (1.2%). The three cardiologists could not reach a consensus about whether AF was present in the 12-lead ECG in one participant, who was therefore excluded from further analyses which are therefore based on 999 participants.

Overall, 50 (5.0%) participants reported having experienced palpitations, racing, pounding, fluttering or irregular heartbeat during the previous four weeks. Of these, 16 were already known, and three were new cases of AF. The inter-observer agreement for the 12-lead ECGs was good for both pairs of cardiologists; the kappa was 0.69 and 0.96 respectively for pair 1 and pair 2.

### **Accuracy of WatchBP and Omron autoanalysis**

Both WatchBP and Omron autoanalysis were highly sensitive (94.9% and 98.7%, respectively) (Table 2). The specificity of WatchBP was 89.7% (95% CI 87.5-91.6) whereas the Omron text message was lower at 76.2% (95%CI 73.3-78.9).

The higher specificity of WatchBP would translate into a markedly lower follow-on ECG rate of 17% to rule in/rule out AF compared to 29.7% with the Omron text message. The superior sensitivity of the Omron text message means the false negative rate is lower than with Watch BP (0.1% vs 0.4%).

The prevalence of AF was 1.4% (11) in the subset of 889 participants who did not have AF recorded on their medical summary. WatchBP and the Omron autoanalysis provided very similar sensitivity and specificity to the total study population and this translated to a follow-on ECG rate of 11% for WatchBP and 24% for the Omron text message. Of these follow on ECGs, 12% would be true positives for the WatchBP flash compared to 5% for the Omron text message.

We modelled a two stage screening process within our total sample, where patients who had a positive result with WatchBP went on to have the Omron autoanalysis. In participants who screened positive using the WatchBP, the sensitivity and specificity of the Omron autoanalysis was 100% (95%CI 95.2-100) and 35.8% (95% CI 26.2-46.3) respectively. This would slightly reduce the follow-on 12-lead ECG requirement from 17% to 13.6%.

### **Accuracy of Omron and Merlin single-lead ECGs interpreted by a cardiologist**

The diagnostic accuracy of the Omron and Merlin single-lead ECGs is shown in figure 3; meta-analysis of the four cardiologist's interpretations gave Omron a summary sensitivity of 94.4% with a summary specificity of 94.6%; Merlin had a summary sensitivity of 93.9% with a summary specificity of 90.1%. Cardiologist variability in single-lead ECG analysis is shown in Table 3. There was fair interobserver agreement (kappa 0.36 and 0.28 for Omron and Merlin respectively) between cardiologist pair 1, and good interobserver agreement (kappa 0.76 for both devices) between the second pair. The cardiologists were unable to interpret whether the trace showed AF on 0-1.2% of patients using Omron and 0-7.2% of occasions using Merlin.



## Discussion

### *Summary of main results*

Our results show that all the methods that we tested have a high sensitivity for detecting AF in an elderly primary care population and thus are useful for ruling out AF. During the study we detected 12 new cases of AF and 7.9% of the study population overall were experiencing AF at the time of the study consultation. The total prevalence in the study sample was 11%, as some patients have paroxysmal AF and were not experiencing arrhythmias at the time of the study.

WatchBP outperformed Omron autoanalysis because it is more specific – 89.7% compared to 76.2% and 78.3% respectively. The specificity of the single-lead ECGs when interpreted by a cardiologist were comparable with WatchBP. Overall Omron produced fewer inconclusive results and achieved slightly better specificity than Merlin. However cardiologist interpretation of the ECG trace was a more powerful factor in determining specificity than the type of monitor used. In this study, operator variability in ECG analysis was partly due to differences in expertise, and partly due to trade-offs made by different cardiologists between sensitivity and specificity.

In our elderly population, only 5% of patients reported experiencing palpitations. Amongst patients who did report palpitations, prevalence of AF was 36%. Most of these patients already had a diagnosis of AF.

### *Strengths and weakness*

The devices were tested on an unselected elderly primary care population. Although our sample did not include the housebound or patients with dementia, we recruited a large population with a prevalence of AF expected for this setting, which allowed us to determine the operating characteristics of each monitor with precision. We believe our population is generalisable to similar primary care settings worldwide.

The cardiologists analysed ECG recordings in line with recommended practice and all had a minimum of 5 years cardiology specialist training. The specificity of one cardiologist was substantially lower than the other three. Further research with a larger sample of cardiologists would be required to more fully interpret this finding. However, we do not believe this diminishes the reliability of our reference standard since the second pair of blinded cardiologists achieved extremely high concordance, and the moderating consultant cardiologist was a specialist electrophysiologist. Having cardiologists rather than general practitioners ascertain the presence or absence of AF on the Omron or Merlin single lead ECGs may have risked over estimating accuracy given the likelihood that cardiologists would have greater skill in ECG interpretation. Finally, given that the devices were used sequentially followed by the 12 lead ECG it is theoretically possible that AF may not have been consistently present or absent during the entire procedure, leading to an increase of false positives and false negatives, however we believe this is a small risk given the extremely short time frame of approximately 10 minutes.

### *Comparison with existing literature*

The operating characteristics of WatchBP in this elderly primary care population are comparable to previous studies undertaken in different populations. In a US study of 405 patients attending a cardiology outpatients where 39% of the sample had an abnormal ECG (AF prevalence 23%) it had a sensitivity of 95% (95% CI 93-98) and specificity of 86% (95% CI 84-89) while in a Greek study of a diverse group of 73 individuals (healthy volunteers, outpatients, and inpatients) it had similar sensitivity of 93% (95% CI 74-99) and specificity of 89% (95% CI 79-96).

1  
2  
3 Omron has been evaluated in a German study of 505 patients in a hospital setting where 66% of the  
4 sample had an abnormal ECG (mean age 61 years, 66% male, AF prevalence 28%) with all analyses  
5 (including the reference standard) being undertaken by a single cardiologist. This study reported  
6 higher accuracy than we demonstrated, with a sensitivity of 99% (95%CI 96-100) and specificity of  
7 96% (95% CI 94-98) for AF. We are unaware of any AF validation studies for Merlin.  
8  
9

### 10 11 12 13 *Clinical implications*

14  
15 Our study supports the recent NICE recommendation that GPs should consider using WatchBP for  
16 elderly patients who have a BP measurement in order to opportunistically identify undiagnosed AF.  
17 Specificity is comparable with a single-lead ECG analysed by a cardiologist and the result does not  
18 require specialist interpretation, which is an advantage over the single-lead ECG monitors and keeps  
19 screening straightforward and costs low. It is easily portable for use in housebound patients.  
20

21 Prior to wider implementation, clinicians need to consider the optimal screening frequency.  
22 Assuming a primary care population in which the majority of AF cases had already been identified,  
23 the WatchBP would indicate a 'positive flash' for 1 in 10 patients who would thus require a follow-up  
24 12-lead ECG. As some patients have their blood pressure measured frequently, there is potential for  
25 recurrent false-positive results and a high demand for 12-lead ECGs. These issues should be  
26 addressed to ensure sustainable implementation in primary care.  
27

28 Paroxysmal AF presents a particular diagnostic challenge because patients may not be experiencing  
29 an arrhythmia when they are being screened with one-off measures. The potential for patients to  
30 undertake self-monitoring and to capture an ECG tracing when an arrhythmia is occurring are  
31 desirable features of an AF screening method. In our study, only 5% of patients reported  
32 experiencing palpitations, which would limit the usefulness of asking patients to record a single-lead  
33 ECG at the time of symptoms. Amongst the patients who did report palpitations, the prevalence of  
34 AF was 36%, but most of these patients already had a diagnosis of AF which might have improved  
35 their awareness of an arrhythmia.  
36

37 WatchBP will not identify atrial flutter, which is also a risk factor for stroke. The prevalence of this is  
38 much lower than AF; in our study it was 0.4%.  
39

### 40 41 *Future research*

42 Screening for AF is not yet routine practice in primary care, therefore determining not only the  
43 optimal device, but the most appropriate and cost effective process is a priority. This could include  
44 an impact analysis using WatchBP as a triage test to evaluate its effectiveness (and cost  
45 effectiveness) for improving the detection of AF and prevention of stroke. Determining the cost  
46 effectiveness of these devices would also have to include doctor time for interpretation of ECGs  
47  
48

### 49 50 *Conclusion*

51 WatchBP performs better than the single-lead ECG monitors as a triage test for identifying AF in  
52 primary care as it does not require any expertise for interpretation and their diagnostic performance  
53 is comparable. It could be used to opportunistically screen elderly patients for undiagnosed AF at  
54 regular intervals and/or during BP measurement. It has advantages over pulse assessment because  
55 the result is objective and it also has a higher specificity, keeping follow-up 12-lead ECGs to a  
56 minimum.  
57  
58  
59  
60

**Contribution of authors**

KK, MS, DM, RH, DF, CH initiated the study and designed the protocol. KK, MS, AV, MT, CH were involved in the conduct and analysis of the trial. MS oversaw data management and monitoring of protocol adherence throughout the trial. KK, AV, MT co-wrote the manuscript. MS, DM, CH, RH, DF contributed to writing the manuscript.

**Full ethical approval**

Was granted of the study by NRES Committee South Central – Oxford A.

**Competing interests**

We received subsidised monitors from Microlife, Omron and Merlin for the submitted work; FDRH has received free or subsidised BP equipment from Omron and Microlife for other research and there are no other relationships or activities that could appear to have influenced the submitted work .

**Data Sharing Statement**

Data on comparative accuracy are available from authors on request, sending email to the corresponding author.

**Copyright**

Crown copyright is claimed for this publication, in accordance with NIHR guidelines.

## References

1. NICE. Atrial Fibrillation: National clinical guideline for management in primary and secondary care. 2006.
2. Fitzmaurice DA, Hobbs FDR, Jowett S, et al. Screening versus routine practice for detection of atrial fibrillation in people aged 65 or over: cluster randomised controlled trial. *BMJ* 2007; 335:383-6.
3. Miyasaka Y, Barnes ME, Bailey KR, et al. Mortality trends in patients diagnosed with first atrial fibrillation – a 21-year community study. *J Am Coll Cardiol* 2007; 49:986-92.
4. Wolf PA, Abbott RD, Kannell WB. Atrial fibrillation as an independent risk factor for stroke: the Framingham study. *Stroke* 1991 Aug; 22(8):983-8.
5. Aguilar MI, Hart R. Oral anticoagulants for preventing stroke in patients with non-valvular atrial fibrillation and no previous history of stroke or transient ischemic attacks. *Cochrane Database of Systematic Reviews* 2005, Issue 3. Edited (no change to conclusions), published in Issue 1, 2009
6. Hobbs F, Fitzmaurice DA, Mant J, et al. A randomised controlled trial and cost-effectiveness study of systematic screening (targeted and total population screening) versus routine practice for the detection of atrial fibrillation in people aged 65 and over. The SAFE study. *Health Technol Assess*. 2005 Oct; 9(40): 1-74.
7. Lin HJ, Wolf PA, Benjamin EJ, et al. Newly diagnosed atrial fibrillation and acute stroke. The Framingham Study. *Stroke* 1995;26:152730.
8. Liao J, Khalid Z, Scallan C, et al. Noninvasive cardiac monitoring for detecting paroxysmal atrial fibrillation or flutter after acute ischemic stroke: a systematic review. *Stroke* 2007;38:
9. 2012 focused update of the ESC Guidelines for the management of atrial fibrillation. An update of the 2010 ESC Guidelines for the management of atrial fibrillation. *European Heart Journal* (2012) 33, 2719–2747
10. Sudlow M, Rodgers H, Kenny RA et al. Identification of patients with atrial fibrillation in general practice: a study of screening methods. *British Medical Journal* 1998;317:327
11. Morgan S, Mant D. Randomised trial of two approaches to screening for atrial fibrillation in UK general practice. *British Journal of General Practice*. 2002;52:373–380
12. Estes, N, Sacco R, Al-Khatib S, et al. American Heart Association Atrial Fibrillation Research Summit. *Circulation*. 2011 July 19; 124(3): 363–372
13. Wiesel J, Fitzig L, Herschman Y, et al. Detection of atrial fibrillation using a modified microlife blood pressure monitor. *Am J Hypertens* 2009; 22(8): 848-852.
14. Stergiou G, Karpettas N, Protogerou A et al. Diagnostic accuracy of a home blood pressure monitor to detect atrial fibrillation. *Journal of Human Hypertension* (2009) 23, 654–65
15. Kaleschke G, Hoffman B, Drewitz I, Steinbeck G, et al. Prospective, multicentre validation of a simple, patient-operated electrocardiographic system for the detection of arrhythmias and electrocardiographic changes. *Europace* (2009) 11 (10): 1362-1368
16. NICE. WatchBP Home A for opportunistically detecting atrial fibrillation during diagnosis and monitoring of hypertension, 2013
17. Lozano R, Naghavi M, Foreman K, et al. Global and regional mortality from 235 causes of death for 20 age groups in 1990 and 2010: A systematic analysis for the Global Burden of Disease Study 2010. *Lancet* 2012; 380:2095
18. Harris K, Edwards D, Mant J. How can we best detect atrial fibrillation? *J R Coll Physicians* 2012;42 Suppl 18:5-22.
19. Macaskill P, Gatsonis C, Deeks J, et al. *Cochrane Handbook for Systematic Reviews of Diagnostic Test Accuracy* Version 1.0. The Cochrane Collaboration, 2010
20. Altman D. *Practical Statistics for Medical Research*. Chapman and Hall/CRC, 1991.

1  
2  
3  
4  
5  
6  
7  
8  
9  
10  
11  
12  
13  
14  
15  
16  
17  
18  
19  
20  
21  
22  
23  
24  
25  
26  
27  
28  
29  
30  
31  
32  
33  
34  
35  
36  
37  
38  
39  
40  
41  
42  
43  
44  
45  
46  
47  
48  
49  
50  
51  
52  
53  
54  
55  
56  
57  
58  
59  
60

For peer review only

**Table 1: Characteristics of participants included in diagnostic accuracy analyses**

|                                                    |                                                    |
|----------------------------------------------------|----------------------------------------------------|
| Total number of participants                       | 999                                                |
| Age (mean)                                         | 79.7 years (range 75.1-99.8)<br>(95% CI 79.4-79.9) |
| Gender % male                                      | 49.3 (95%CI 46.2-52.5)                             |
| Co-morbidities (from medical summary)              |                                                    |
| Atrial fibrillation                                | 110 (11%)                                          |
| Heart failure                                      | 31 (3.1%)                                          |
| Hypertension                                       | 533 (53.3%)                                        |
| Diabetes                                           | 122 (12.2%)                                        |
| Stroke                                             | 31 (3.1%)                                          |
| Transient ischaemic attack                         | 65 (6.5%)                                          |
| Participants with AF on anti-arrhythmic medication | 87(8.7%)                                           |

**Table 2: Diagnostic performance of WatchBP and Omron autoanalysis for detecting atrial fibrillation**

| n=999*<br>Prevalence 7.9% | WatchBP<br>with AF indicator flash<br>(95% CI) | Omron<br>autoanalysis*<br>(95%CI) |
|---------------------------|------------------------------------------------|-----------------------------------|
| Sensitivity %             | 94.9 (87.5-98.6)                               | 98.7(93.2-100 )                   |
| Specificity %             | 89.7 (87.5-91.6)                               | 76.2 (73.3-78.9)                  |
| Positive likelihood ratio | 9.2 (7.6-11.2)                                 | 4.15 (3.69-4.67)                  |
| Negative likelihood ratio | 0.057 (0.022-0.15)                             | 0.017 (0.0024-0.12)               |
| Positive predictive value | 44.1 (36.5-51.9)                               | 26.3 (21.3-31.7)                  |
| Negative predictive value | 99.5 (98.8-99.9)                               | 99.9 (99.2-100)                   |

\*text message 'irregular 'or 'analysis impossible' counted as positive test

Table 3: Diagnostic performance of Omron and Merlin single-lead ECGs for detecting atrial fibrillation

| n=999*<br>Prevalence 7.9%    | Interpretation  | Omron<br>single-lead ECG<br>(95% CI) | Merlin<br>single-lead ECG<br>(95% CI) |
|------------------------------|-----------------|--------------------------------------|---------------------------------------|
| Sensitivity %                | Cardiologist: 1 | 95 (82-99)                           | 97 (85-100)                           |
|                              | 2               | 95 (82-99)                           | 91 (77-98)                            |
|                              | 3               | 90 (77-97)                           | 98 (87-100)                           |
|                              | 4               | 98 (87-100)                          | 88 (74-96)                            |
| Specificity %                | Cardiologist: 1 | 75 (71-79)                           | 76 (71-80)                            |
|                              | 2               | 98 (96-99)                           | 95 (93-97)                            |
|                              | 3               | 97 (96-99)                           | 92 (89-94)                            |
|                              | 4               | 95 (92-97)                           | 91 (88-94)                            |
| Positive likelihood<br>ratio | Cardiologist: 1 | 3.8 (3.2-4.6)                        | 3.99 (3.3-4.8)                        |
|                              | 2               | 41.8 (22.5-77.5)                     | 18.8 (12.2-28.8)                      |
|                              | 3               | 35.8 (20.3-63.1)                     | 11.5 (8.5-15.6)                       |
|                              | 4               | 18.5 (12.6-27.2)                     | 10.1 (7.4-13.9)                       |
| Negative likelihood<br>ratio | Cardiologist: 1 | 0.07 (0.02-0.28)                     | 0.04 (0.01-0.26)                      |
|                              | 2               | 0.05 (0.01-0.21)                     | 0.09 (0.03-0.27)                      |
|                              | 3               | 0.098 (0.04-0.25)                    | 0.03 (0.004-0.18)                     |
|                              | 4               | 0.02 (0.004-0.17)                    | 0.13 (0.06-0.3)                       |
| Positive predictive<br>value | Cardiologist: 1 | 24.1 (17.4-31.9)                     | 24.5 (17.6-32.5)                      |
|                              | 2               | 77.8 (62.9-88.8)                     | 60.4 (46.0-73.5)                      |
|                              | 3               | 76.0 (61.8-86.9)                     | 50.6 (39.3-61.9)                      |
|                              | 4               | 62.1 (49.3-73.8)                     | 47.4 (36.0-59.1)                      |
| Negative predictive<br>value | Cardiologist: 1 | 99.4 (97.9-99.9)                     | 99.7 (98.3-100)                       |
|                              | 2               | 99.5 (98.3-99.9)                     | 99.3 (97.9-99.8)                      |
|                              | 3               | 99.1 (97.8-99.8)                     | 99.8 (98.7-100)                       |
|                              | 4               | 99.8 (98.8-100)                      | 98.9 (97.3-99.6)                      |



1  
2  
3 Figure legends  
4

5 Figure 1: Patient recruitment flow chart  
6

7 Figure 2: Predictive value of WatchBP and Omron autoanalysis for detecting AF  
8

9 Figure 3: Forest plot of diagnostic accuracy per cardiologist of Omron and Merlin single-lead  
10 ECGs  
11  
12  
13  
14  
15  
16  
17  
18  
19  
20  
21  
22  
23  
24  
25  
26  
27  
28  
29  
30  
31  
32  
33  
34  
35  
36  
37  
38  
39  
40  
41  
42  
43  
44  
45  
46  
47  
48  
49  
50  
51  
52  
53  
54  
55  
56  
57  
58  
59  
60

For peer review only

1  
2  
3 **Triage tests for identifying atrial fibrillation in primary care: a diagnostic accuracy study comparing**  
4 **single lead ECG and modified BP monitors**

5  
6 Karen Kearley<sup>1</sup>, Mary Selwood<sup>1</sup>, Ann Van den Bruel<sup>1</sup>, Matthew Thompson<sup>1,2</sup>, David Mant<sup>1</sup>, FD Richard  
7 Hobbs<sup>1</sup>, David Fitzmaurice<sup>3</sup>, Carl Heneghan<sup>1</sup>.

8  
9 Karen Kearley Clinical Scientist, Mary Selwood Research Nurse, Ann Van den Bruel Clinical Lecturer,  
10 Matthew Thompson [Senior Clinical Researcher & Professor](#), David Mant Professor, Richard Hobbs  
11 Head of Primary Care Health Sciences, Carl Heneghan [Clinical Professor Reader](#)

12  
13 <sup>1</sup>Nuffield Department of Primary Care Health Sciences, University of Oxford, New Radcliffe House,  
14 2nd floor, Walton Street, Jericho, OX2 6NW, UK

15  
16 <sup>2</sup>Department of Family Medicine, University of Washington, Seattle, WA 98195-4696

17  
18 <sup>3</sup>Primary Care Clinical Sciences, University of Birmingham, Edgbaston, B15 2TT, Fitzmaurice D  
19 Professor,

20  
21 Correspondence to: Matthew.Thompson@phc.ox.ac.uk

22  
23 **Support:** This publication presents independent research funded by the National Institute for Health  
24 Research (NIHR) under its Programme Grants for Applied Research funding scheme (RP-PG-0407-  
25 10347) and the NIHR School for Primary Care Research. The views expressed in this publication are  
26 those of the author(s) and not necessarily those of the NHS, the NIHR or the Department of Health.

27  
28 **Prior presentations:** *Society of Academic Primary Care Conference* November 2012 (Glasgow) and  
29 July 2013 (Nottingham), and *North American Primary Care Research Group* (Ottawa, 2013).

30  
31 *Word Count: 2789*

32  
33 *Numbers of tables: 3*

34  
35 *Numbers of figures: 3*

## Abstract

**Objectives:** New electronic devices offer an opportunity within routine primary care settings for improving the detection of atrial fibrillation (AF), which is a common cardiac arrhythmia and a modifiable risk factor for stroke. We aimed to assess the performance of a modified blood pressure monitor and two single-lead ECG devices, as diagnostic triage tests for the detection of AF.

**Setting:** Six General Practices in the United Kingdom

**Participants:** 1000 ambulatory patients aged 75 years and over

**Primary and secondary outcome measures:** Comparative diagnostic accuracy of modified blood pressure monitor and single-lead ECG devices, compared to reference standard of 12-lead ECG, independently interpreted by cardiologists.

**Results:** A total of 79 participants (7.9%) had AF diagnosed by 12-lead ECG. All three devices had a high sensitivity (93.9-98.7%) and are useful for ruling out AF. WatchBP is a better triage test than Omron autoanalysis because it is more specific - 89.7% (95% CI 87.5-91.6) compared to 78.3% (95% CI 73.0-82.9) respectively. This would translate into a lower follow-on ECG rate of 17% to rule in/rule out AF compared to 29.7% with the Omron text message in the study population. The overall specificity of single-lead ECGs analysed by a cardiologist was 94.6% for Omron and 90.1% for Merlin.

**Conclusions:** WatchBP performs better as a triage test for identifying AF in primary care than the single-lead ECG monitors as it does not require expertise for interpretation and its diagnostic performance is comparable to single-lead ECG analysis by cardiologists. It could be used opportunistically to screen elderly patients for undiagnosed AF at regular intervals and/or during BP measurement.

**Trial Registration** – not required.

## Strengths and Limitations of this study

### *Strengths*

- Three devices for detecting atrial fibrillation were tested on an unselected elderly primary care population of 1000 individuals.
- The prevalence of AF expected for this setting, which allowed us to determine the operating characteristics of each monitor with precision.
- Our population is generalisable to similar primary care settings worldwide.
- A reference standard (12 lead ECG) was performed on all patients, and interpreted blindly by cardiologists.

### *Limitations:*

- The specificity of one cardiologist was substantially lower than the other three.
- Only 12 new cases of atrial fibrillation were detected in this setting, which is as expected for a primary care population such as this

## Introduction

Atrial fibrillation is the most common cardiac arrhythmia; present in more than 10% of patients aged 75 years or over<sup>1,2</sup>, and it significantly increases morbidity and mortality.<sup>3</sup> The main significance of atrial fibrillation (AF) is as a major independent risk factor for stroke and thromboembolism,<sup>4</sup> particularly in older patients. A large evidence base supports the efficacy of oral anticoagulation in reducing AF stroke risk by two-thirds<sup>5</sup>. AF may be asymptomatic but can be identified by detecting a characteristic irregularity in pulse rhythm. Despite this, it was found to be undiagnosed in 3.8% of patients aged over 75 years in a large UK screening study<sup>6</sup>. Indeed, undiagnosed AF is associated with 3.8-6.1% of all strokes<sup>7,8</sup>. Given the importance of identifying stroke risk patients, the high prevalence of AF, and the effective prevention strategies, there is a strong case to consider screening for atrial fibrillation.

European guidelines for the management of AF recommend opportunistic pulse assessment by a primary-care practitioner with a follow-up electrocardiogram (ECG) for an irregular pulse, an approach which is more cost effective than systematic screening with a 12-lead ECG.<sup>6,9</sup> In primary care research studies the sensitivity of nurse pulse assessment is high, varying between studies from 87-97% although it has a lower specificity (70 to 81%) requiring one out of every three or four screened patients to have a follow-up ECG<sup>6,10,11</sup>. This is a significant additional workload and could be a barrier to widespread implementation of opportunistic screening. Although pulse examination is a simple screening technique for AF, its detection relies on a subjective assessment in a busy routine care setting, which may partly explain why AF remains undetected in many patients. Indeed the American Heart Association suggests there is a need to develop strategies to detect AF more effectively in individuals and populations.<sup>12</sup>

Several new electronic devices have the potential to be useful triage tests for AF and initial studies suggest these have higher specificity than pulse palpation, so could significantly reduce the need for confirmatory 12-lead ECGs - but none have been evaluated in a primary care settings<sup>13,14,15</sup>. The National Institute for Health and Clinical Excellence (NICE) has recently suggested that using a blood pressure monitor, WatchBP, which is modified to detect irregularity of pulse during BP measurement in the elderly, together with appropriate anticoagulation of those subsequently diagnosed with AF, has the potential to reduce the incidence of stroke<sup>16</sup>. As stroke is the third leading cause of global disease burden, this would have substantial economic and patient benefits worldwide<sup>16,17</sup>.

## Methods:

### *Study design*

An observational study comparing the accuracy of a modified BP monitor (WatchBP), and two single-lead ECG devices, one with an auto-analysis function (Omron) and one without (Merlin), with the reference standard of blinded cardiologist diagnosis of atrial fibrillation from a 12-lead ECG.

### *Participants*

We recruited participants aged 75 years or over, living at home, from six general practices in the UK between May 2011 and October 2012. Having excluded patients with implanted pacemakers or defibrillators, those unable to give informed consent, or patients in whom the GP considered participation was inappropriate (e.g. terminal illness), all other patients over 75 were invited to take part until the sample size had been achieved (i.e. 1000 participants had been recruited). A diagnosis of AF recorded in the patient GP record was not used as part of the selection criteria. Consenting study participants identified from GP records and meeting the eligibility criteria attended a 30-minute appointment with a practice nurse for the testing procedure.

### *Test procedure*

All participants received the tests in the same order, which were delivered by nine registered nurses working within the practices.

Firstly, the nurse used WatchBP (Microlife, Switzerland) a modified oscillometric BP monitor which flashes when it detects an irregular pulse during automatic BP measurement.

Secondly, the nurse then applied an Omron monitor (model HCG-801, Omron Healthcare Europe, The Netherlands) which involved placing one electrode on the bare chest wall 5 cm below the nipple, whilst the patient held the other electrode with the right index finger. The monitor records a single-lead ECG tracing, and displays a message indicating the presence of possible AF. The device's analysis algorithm includes several cardiac rhythms which could potentially be AF, including fast and irregular, slow and irregular, irregular and those where analysis impossible. The single-lead recording and text message were recorded and saved for later downloading and analysis.

Thirdly, the nurse applied a Merlin ECG event recorder (Meditech Ltd, Hungary) which resembles a watch, on participants' left wrist. The participant covered the electrode on the face of the device with the palm of their right hand for 30 seconds. The recording, with no automated analysis, was saved to a computer for later downloading and analysis. Unlike the Omron, the Merlin monitor does not require removal of any clothing, making it possible for use in public settings, an advantage for participants experiencing an intermittent arrhythmia.

The nurse recorded the results of the WatchBP monitor and the Omron automated text message during the initial examination. Each single-lead ECG trace was sent for interpretation to two independent cardiologists after removing all clinical information and patient identification except for date of birth and the text message (Omron only).

Participants were asked if they had experienced palpitations, racing, pounding, fluttering or irregular heartbeat in the previous 4 weeks.

### *The reference standard*

A 12-lead ECG was performed on all participants at the end of the visit, using standard procedures. ECGs were independently interpreted by a panel of two cardiologists, blind to all patient identifiers, clinical details, results of triage tests, but not blind to study objectives. They were asked to classify the ECG as atrial fibrillation or atrial flutter (yes/no/don't know). A third cardiologist, also blind to any of the other study results, interpreted the ECG readings for which there was no consensus or if both cardiologists were uncertain about the presence of AF. AF is defined as the absence of distinct 'p' waves, an absolutely irregular RR interval and an atrial cycle length <200ms (300bpm) on a 12-lead ECG<sup>17</sup>.

To cope with the workload, the task was divided between two separate pairs of cardiologists. All had completed cardiology specialist training of between five and six years. The third cardiologist, whose role was to resolve uncertainty and moderate disagreement, was a specialist electro-physiologist.

### *Study power and analysis*

We anticipated that the overall prevalence of AF, including both new and prior diagnoses, would be 10%. We therefore estimated that 1000 participants would be needed to provide sufficient precision to estimate the sensitivity of each device with a maximum 95% CI of +/-10%.

We compared the accuracy of the WatchBP, Omron (text and tracing) and Merlin monitors, with a 12-lead ECG for detection of AF. All inconclusive results were treated as positive in our analysis

1  
2  
3 (because in the clinical situation these participants could not have AF ruled out and would need to  
4 have a 12-lead ECG). We calculated sensitivity, specificity, likelihood ratios and 95% confidence  
5 intervals for each test. Analyses for both single-lead ECGs were done per cardiologist and the results  
6 were subsequently combined using a random effects bivariate model calculating overall sensitivity  
7 and specificity<sup>19</sup>. We analysed the inter-observer agreement of whether the single lead ECG trace  
8 showed AF between the cardiologists within each pair together with the kappa value<sup>20</sup>.  
9

10 We performed subset analyses of the comparative accuracy in patients with and without existing  
11 diagnoses of AF (whether or not treated) recorded in GP records. In addition, we modelled a 2-stage  
12 screening process for AF by examining patients who were WatchBP flash positive and analysing the  
13 sensitivity and specificity of the Omron autoanalysis in this subgroup.  
14

15 Data analysis was performed using Stata version 11S  
16  
17  
18  
19  
20  
21  
22  
23  
24  
25  
26  
27  
28  
29  
30  
31  
32  
33  
34  
35  
36  
37  
38  
39  
40  
41  
42  
43  
44  
45  
46  
47  
48  
49  
50  
51  
52  
53  
54  
55  
56  
57  
58  
59  
60

## Results

Of 6529 potentially eligible patients, we invited 2673 for a screening visit; no further invitations were sent after the required 1000 sample had been achieved (Figure 1). Participants had an average age of 79.7 years (range 75.1 to 99.8 years), 49.3% were male (Table 1). 110 had AF recorded in the medical summary (11.0%), of whom 67 (67/110, 61%) had evidence of AF on their 12-lead ECG at the study visit. AF was noted in a further 12 participants based on the 12-lead ECG (1.2%). The three cardiologists could not reach a consensus about whether AF was present in the 12-lead ECG in one participant, who was therefore excluded from further analyses which are therefore based on 999 participants.

Overall, 50 (5.0%) participants reported having experienced palpitations, racing, pounding, fluttering or irregular heartbeat during the previous four weeks. Of these, 16 were already known, and three were new cases of AF. The inter-observer agreement for the 12-lead ECGs was good for both pairs of cardiologists; the kappa was 0.69 and 0.96 respectively for pair 1 and pair 2.

### **Accuracy of WatchBP and Omron autoanalysis**

Both WatchBP and Omron autoanalysis were highly sensitive (94.9% and 98.7%, respectively) (Table 2). The specificity of WatchBP was 89.7% (95% CI 87.5-91.6) whereas the Omron text message was lower at 76.2% (95%CI 73.3-78.9).

The higher specificity of WatchBP would translate into a markedly lower follow-on ECG rate of 17% to rule in/rule out AF compared to 29.7% with the Omron text message. The superior sensitivity of the Omron text message means the false negative rate is lower than with Watch BP (0.1% vs 0.4%).

The prevalence of AF was 1.4% (11) in the subset of 889 participants who did not have AF recorded on their medical summary. WatchBP and the Omron autoanalysis provided very similar sensitivity and specificity to the total study population and this translated to a follow-on ECG rate of 11% for WatchBP and 24% for the Omron text message. Of these follow on ECGs, 12% would be true positives for the WatchBP flash compared to 5% for the Omron text message.

We modelled a two stage screening process within our total sample, where patients who had a positive result with WatchBP went on to have the Omron autoanalysis. In participants who screened positive using the WatchBP, the sensitivity and specificity of the Omron autoanalysis was 100% (95%CI 95.2-100) and 35.8% (95% CI 26.2-46.3) respectively. This would slightly reduce the follow-on 12-lead ECG requirement from 17% to 13.6%.

### **Accuracy of Omron and Merlin single-lead ECGs interpreted by a cardiologist**

The diagnostic accuracy of the Omron and Merlin single-lead ECGs is shown in figure 3; meta-analysis of the four cardiologist's interpretations gave Omron a summary sensitivity of 94.4% with a summary specificity of 94.6%; Merlin had a summary sensitivity of 93.9% with a summary specificity of 90.1%. Cardiologist variability in single-lead ECG analysis is shown in Table 3. There was fair interobserver agreement (kappa 0.36 and 0.28 for Omron and Merlin respectively) between cardiologist pair 1, and good interobserver agreement (kappa 0.76 for both devices) between the second pair. The cardiologists were unable to interpret whether the trace showed AF on 0-1.2% of patients using Omron and 0-7.2% of occasions using Merlin.



## Discussion

### *Summary of main results*

Our results show that all the methods that we tested have a high sensitivity for detecting AF in an elderly primary care population and thus are useful for ruling out AF. During the study we detected 12 new cases of AF and 7.9% of the study population overall were experiencing AF at the time of the study consultation. The total prevalence in the study sample was 11%, as some patients have paroxysmal AF and were not experiencing arrhythmias at the time of the study.

WatchBP outperformed Omron autoanalysis because it is more specific – 89.7% compared to 76.2% and 78.3% respectively. The specificity of the single-lead ECGs when interpreted by a cardiologist were comparable with WatchBP. Overall Omron produced fewer inconclusive results and achieved slightly better specificity than Merlin. However cardiologist interpretation of the ECG trace was a more powerful factor in determining specificity than the type of monitor used. In this study, operator variability in ECG analysis was partly due to differences in expertise, and partly due to trade-offs made by different cardiologists between sensitivity and specificity.

In our elderly population, only 5% of patients reported experiencing palpitations. Amongst patients who did report palpitations, prevalence of AF was 36%. Most of these patients already had a diagnosis of AF.

### *Strengths and weakness*

The devices were tested on an unselected elderly primary care population. Although our sample did not include the housebound or patients with dementia, we recruited a large population with a prevalence of AF expected for this setting, which allowed us to determine the operating characteristics of each monitor with precision. We believe our population is generalisable to similar primary care settings worldwide.

The cardiologists analysed ECG recordings in line with recommended practice and all had a minimum of 5 years cardiology specialist training. The specificity of one cardiologist was substantially lower than the other three. Further research with a larger sample of cardiologists would be required to more fully interpret this finding. However, we do not believe this diminishes the reliability of our reference standard since the second pair of blinded cardiologists achieved extremely high concordance, and the moderating consultant cardiologist was a specialist electrophysiologist. Having cardiologists rather than general practitioners ascertain the presence or absence of AF on the Omron or Merlin single lead ECGs may have risked over estimating accuracy given the likelihood that cardiologists would have greater skill in ECG interpretation. Finally, given that the devices were used sequentially followed by the 12 lead ECG it is theoretically possible that AF may not have been consistently present or absent during the entire procedure, leading to an increase of false positives and false negatives, however we believe this is a small risk given the extremely short time frame of approximately 10 minutes.

### *Comparison with existing literature*

The operating characteristics of WatchBP in this elderly primary care population are comparable to previous studies undertaken in different populations. In a US study of 405 patients attending a cardiology outpatients where 39% of the sample had an abnormal ECG (AF prevalence 23%) it had a sensitivity of 95% (95% CI 93-98) and specificity of 86% (95% CI 84-89) while in a Greek study of a diverse group of 73 individuals (healthy volunteers, outpatients, and inpatients) it had similar sensitivity of 93% (95% CI 74-99) and specificity of 89% (95% CI 79-96).



1  
2  
3 Omron has been evaluated in a German study of 505 patients in a hospital setting where 66% of the  
4 sample had an abnormal ECG (mean age 61 years, 66% male, AF prevalence 28%) with all analyses  
5 (including the reference standard) being undertaken by a single cardiologist. This study reported  
6 higher accuracy than we demonstrated, with a sensitivity of 99% (95%CI 96-100) and specificity of  
7 96% (95% CI 94-98) for AF. We are unaware of any AF validation studies for Merlin.  
8  
9

### 10 11 12 13 *Clinical implications*

14  
15 Our study supports the recent NICE recommendation that GPs should consider using WatchBP for  
16 elderly patients who have a BP measurement in order to opportunistically identify undiagnosed AF.  
17 Specificity is comparable with a single-lead ECG analysed by a cardiologist and the result does not  
18 require specialist interpretation, which is an advantage over the single-lead ECG monitors and keeps  
19 screening straightforward and costs low. It is easily portable for use in housebound patients.  
20

21 Prior to wider implementation, clinicians need to consider the optimal screening frequency.  
22 Assuming a primary care population in which the majority of AF cases had already been identified,  
23 the WatchBP would indicate a 'positive flash' for 1 in 10 patients who would thus require a follow-up  
24 12-lead ECG. As some patients have their blood pressure measured frequently, there is potential for  
25 recurrent false-positive results and a high demand for 12-lead ECGs. These issues should be  
26 addressed to ensure sustainable implementation in primary care.  
27

28 Paroxysmal AF presents a particular diagnostic challenge because patients may not be experiencing  
29 an arrhythmia when they are being screened with one-off measures. The potential for patients to  
30 undertake self-monitoring and to capture an ECG tracing when an arrhythmia is occurring are  
31 desirable features of an AF screening method. In our study, only 5% of patients reported  
32 experiencing palpitations, which would limit the usefulness of asking patients to record a single-lead  
33 ECG at the time of symptoms. Amongst the patients who did report palpitations, the prevalence of  
34 AF was 36%, but most of these patients already had a diagnosis of AF which might have improved  
35 their awareness of an arrhythmia.  
36

37 WatchBP will not identify atrial flutter, which is also a risk factor for stroke. The prevalence of this is  
38 much lower than AF; in our study it was 0.4%.  
39

### 40 41 *Future research*

42 Screening for AF is not yet routine practice in primary care, therefore determining not only the  
43 optimal device, but the most appropriate and cost effective process is a priority. This could include  
44 an impact analysis using WatchBP as a triage test to evaluate its effectiveness (and cost  
45 effectiveness) for improving the detection of AF and prevention of stroke. [Determining the cost  
46 effectiveness of these devices would also have to include doctor time for interpretation of ECGs](#)  
47  
48

### 49 50 *Conclusion*

51 WatchBP performs better than the single-lead ECG monitors as a triage test for identifying AF in  
52 primary care as it does not require any expertise for interpretation and their diagnostic performance  
53 is comparable. It could be used to opportunistically screen elderly patients for undiagnosed AF at  
54 regular intervals and/or during BP measurement. It has advantages over pulse assessment because  
55 the result is objective and it also has a higher specificity, keeping follow-up 12-lead ECGs to a  
56 minimum.  
57

### 58 59 **Contribution of authors**

1  
2  
3 KK, MS, DM, RH, DF, CH initiated the study and designed the protocol. KK, MS, AV, MT, CH were  
4 involved in the conduct and analysis of the trial. MS oversaw data management and monitoring of  
5 protocol adherence throughout the trial. KK, AV, MT co-wrote the manuscript. MS, DM, CH, RH, DF  
6 contributed to writing the manuscript.  
7

8 **Full ethical approval** was granted of the study by NRES Committee South Central – Oxford A.  
9

### 10 11 12 13 14 **Competing interests**

15 We received subsidised monitors from Microlife, Omron and Merlin for the submitted work; FDRH  
16 has received free or subsidised BP equipment from Omron and Microlife for other research and  
17 there are no other relationships or activities that could appear to have influenced the submitted  
18 work.  
19

### 20 21 **Copyright**

22 Crown copyright is claimed for this publication, in accordance with NIHR guidelines.  
23

### 24 25 **References**

- 26 1. NICE. Atrial Fibrillation: National clinical guideline for management in primary and secondary  
27 care. 2006.
- 28 2. Fitzmaurice DA, Hobbs FDR, Jowett S, Mant J, Murray E, Holder R et al. Screening versus  
29 routine practice for detection of atrial fibrillation in people aged 65 or over: cluster  
30 randomised controlled trial. *BMJ* 2007; 335:383-6.
- 31 3. Miyasaka Y, Barnes ME, Bailey KR, Cha SS, Gersh BJ, Seward JB, Tsang TS. Mortality trends in  
32 patients diagnosed with first atrial fibrillation – a 21-year community study. *J Am Coll Cardiol*  
33 2007; 49:986-92.
- 34 4. Wolf PA, Abbott RD, Kannell WB. Atrial fibrillation as an independent risk factor for stroke:  
35 the Framingham study. *Stroke* 1991 Aug; 22(8):983-8.
- 36 5. Aguilar MI, Hart R. Oral anticoagulants for preventing stroke in patients with non-valvular  
37 atrial fibrillation and no previous history of stroke or transient ischemic attacks. *Cochrane*  
38 *Database of Systematic Reviews* 2005, Issue 3. Edited (no change to conclusions), published  
39 in Issue 1, 2009
- 40 6. Hobbs F, Fitzmaurice DA, Mant J, Murray E, Jowett S, Bryan S, et al. A randomised controlled  
41 trial and cost-effectiveness study of systematic screening (targeted and total population  
42 screening) versus routine practice for the detection of atrial fibrillation in people aged 65 and  
43 over. The SAFE study. *Health Technol Assess*. 2005 Oct; 9(40): 1-74.
- 44 7. Lin HJ, Wolf PA, Benjamin EJ, Belanger AJ, D'Agostino RB. Newly diagnosed atrial fibrillation  
45 and acute stroke. The Framingham Study. *Stroke* 1995;26:1527-30.
- 46 8. Liao J, Khalid Z, Scallan C, Morillo C, O'Donnell M. Noninvasive cardiac monitoring for  
47 detecting paroxysmal atrial fibrillation or flutter after acute ischemic stroke: a systematic  
48 review. *Stroke* 2007;38:
- 49 9. 2012 focused update of the ESC Guidelines for the management of atrial fibrillation. An  
50 update of the 2010 ESC Guidelines for the management of atrial fibrillation. *European Heart*  
51 *Journal* (2012) 33, 2719–2747
- 52 10. Sudlow M, Rodgers H, Kenny RA Thomson R. Identification of patients with atrial fibrillation in  
53 general practice: a study of screening methods. *British Medical Journal* 1998;317:327  
54  
55  
56  
57  
58  
59  
60

11. Morgan S, Mant D. Randomised trial of two approaches to screening for atrial fibrillation in UK general practice. *British Journal of General Practice*. 2002;52:373–380
12. Estes, N, Sacco R, Al-Khatib S, Ellinor P, Bezanson J, Alonso A, et al. American Heart Association Atrial Fibrillation Research Summit. *Circulation*. 2011 July 19; 124(3): 363–372
13. Wiesel J, Fitzig L, Herschman Y, Messineo F. Detection of atrial fibrillation using a modified microlife blood pressure monitor. *Am J Hypertens* 2009; 22(8): 848-852.
14. Stergiou G, Karpettas N, Protogerou A Nasothimiou EG, Kyriakidis M. Diagnostic accuracy of a home blood pressure monitor to detect atrial fibrillation. *Journal of Human Hypertension* (2009) 23, 654–65
15. Kaleschke G, Hoffman B, Drewitz I, Steinbeck G, Naebauer M, Goette A, et al. Prospective, multicentre validation of a simple, patient-operated electrocardiographic system for the detection of arrhythmias and electrocardiographic changes. *Europace* (2009) 11 (10): 1362-1368
16. NICE. WatchBP Home A for opportunistically detecting atrial fibrillation during diagnosis and monitoring of hypertension, 2013
17. Lozano R, Naghavi M, Foreman K, Lim S, Shibuya K, Aboyans V et al. Global and regional mortality from 235 causes of death for 20 age groups in 1990 and 2010: A systematic analysis for the Global Burden of Disease Study 2010. *Lancet* 2012; 380:2095
18. Harris K, Edwards D, Mant J. How can we best detect atrial fibrillation? *J R Coll Physicians* 2012;42 Suppl 18:5-22.
19. Macaskill P, Gatsonis C, Deeks J, Harbord R, Takwoingi Y. Chapter 10: Analysing and Presenting Results. In: Deeks JJ, Bossuyt PM, Gatsonis C (editors), *Cochrane Handbook for Systematic Reviews of Diagnostic Test Accuracy* Version 1.0. The Cochrane Collaboration, 2010
20. Altman D. *Practical Statistics for Medical Research*. Chapman and Hall/CRC, 1991.

**Table 1: Characteristics of participants included in diagnostic accuracy analyses**

|                                                    |                                                    |
|----------------------------------------------------|----------------------------------------------------|
| Total number of participants                       | 999                                                |
| Age (mean)                                         | 79.7 years (range 75.1-99.8)<br>(95% CI 79.4-79.9) |
| Gender % male                                      | 49.3 (95%CI 46.2-52.5)                             |
| Co-morbidities (from medical summary)              |                                                    |
| Atrial fibrillation                                | 110 (11%)                                          |
| Heart failure                                      | 31 (3.1%)                                          |
| Hypertension                                       | 533 (53.3%)                                        |
| Diabetes                                           | 122 (12.2%)                                        |
| Stroke                                             | 31 (3.1%)                                          |
| Transient ischaemic attack                         | 65 (6.5%)                                          |
| Participants with AF on anti-arrhythmic medication | 87(8.7%)                                           |

**Table 2: Diagnostic performance of WatchBP and Omron autoanalysis for detecting atrial fibrillation**

| n=999*<br>Prevalence 7.9% | WatchBP<br>with AF indicator flash<br>(95% CI) | Omron<br>autoanalysis*<br>(95%CI) |
|---------------------------|------------------------------------------------|-----------------------------------|
| Sensitivity %             | 94.9 (87.5-98.6)                               | 98.7(93.2-100 )                   |
| Specificity %             | 89.7 (87.5-91.6)                               | 76.2 (73.3-78.9)                  |
| Positive likelihood ratio | 9.2 (7.6-11.2)                                 | 4.15 (3.69-4.67)                  |
| Negative likelihood ratio | 0.057 (0.022-0.15)                             | 0.017 (0.0024-0.12)               |
| Positive predictive value | 44.1 (36.5-51.9)                               | 26.3 (21.3-31.7)                  |
| Negative predictive value | 99.5 (98.8-99.9)                               | 99.9 (99.2-100)                   |

\*text message 'irregular 'or 'analysis impossible' counted as positive test

Table 3: Diagnostic performance of Omron and Merlin single-lead ECGs for detecting atrial fibrillation

| n=999*<br>Prevalence 7.9%    | Interpretation  | Omron<br>single-lead ECG<br>(95% CI) | Merlin<br>single-lead ECG<br>(95% CI) |
|------------------------------|-----------------|--------------------------------------|---------------------------------------|
| Sensitivity %                | Cardiologist: 1 | 95 (82-99)                           | 97 (85-100)                           |
|                              | 2               | 95 (82-99)                           | 91 (77-98)                            |
|                              | 3               | 90 (77-97)                           | 98 (87-100)                           |
|                              | 4               | 98 (87-100)                          | 88 (74-96)                            |
| Specificity %                | Cardiologist: 1 | 75 (71-79)                           | 76 (71-80)                            |
|                              | 2               | 98 (96-99)                           | 95 (93-97)                            |
|                              | 3               | 97 (96-99)                           | 92 (89-94)                            |
|                              | 4               | 95 (92-97)                           | 91 (88-94)                            |
| Positive likelihood<br>ratio | Cardiologist: 1 | 3.8 (3.2-4.6)                        | 3.99 (3.3-4.8)                        |
|                              | 2               | 41.8 (22.5-77.5)                     | 18.8 (12.2-28.8)                      |
|                              | 3               | 35.8 (20.3-63.1)                     | 11.5 (8.5-15.6)                       |
|                              | 4               | 18.5 (12.6-27.2)                     | 10.1 (7.4-13.9)                       |
| Negative likelihood<br>ratio | Cardiologist: 1 | 0.07 (0.02-0.28)                     | 0.04 (0.01-0.26)                      |
|                              | 2               | 0.05 (0.01-0.21)                     | 0.09 (0.03-0.27)                      |
|                              | 3               | 0.098 (0.04-0.25)                    | 0.03 (0.004-0.18)                     |
|                              | 4               | 0.02 (0.004-0.17)                    | 0.13 (0.06-0.3)                       |
| Positive predictive<br>value | Cardiologist: 1 | 24.1 (17.4-31.9)                     | 24.5 (17.6-32.5)                      |
|                              | 2               | 77.8 (62.9-88.8)                     | 60.4 (46.0-73.5)                      |
|                              | 3               | 76.0 (61.8-86.9)                     | 50.6 (39.3-61.9)                      |
|                              | 4               | 62.1 (49.3-73.8)                     | 47.4 (36.0-59.1)                      |
| Negative predictive<br>value | Cardiologist: 1 | 99.4 (97.9-99.9)                     | 99.7 (98.3-100)                       |
|                              | 2               | 99.5 (98.3-99.9)                     | 99.3 (97.9-99.8)                      |
|                              | 3               | 99.1 (97.8-99.8)                     | 99.8 (98.7-100)                       |
|                              | 4               | 99.8 (98.8-100)                      | 98.9 (97.3-99.6)                      |

1  
2  
3  
4  
5  
6  
7  
8  
9  
10  
11  
12  
13  
14  
15  
16  
17  
18  
19  
20  
21  
22  
23  
24  
25  
26  
27  
28  
29  
30  
31  
32  
33  
34  
35  
36  
37  
38  
39  
40  
41  
42  
43  
44  
45  
46  
47  
48  
49  
50  
51  
52  
53  
54  
55  
56  
57  
58  
59  
60

Figure legends

Figure 1: Patient recruitment flow chart

Figure 2: Predictive value of WatchBP and Omron autoanalysis for detecting AF

Figure 3: Forest plot of diagnostic accuracy per cardiologist of Omron and Merlin single-lead ECGs

For peer review only

1  
2  
3  
4  
5  
6  
7  
8  
9  
10  
11  
12  
13  
14  
15  
16  
17  
18  
19  
20  
21  
22  
23  
24  
25  
26  
27  
28  
29  
30  
31  
32  
33  
34  
35  
36  
37  
38  
39  
40  
41  
42  
43  
44  
45  
46  
47  
48  
49  
50  
51  
52  
53  
54  
55  
56  
57  
58  
59  
60

Figure 1: Patient recruitment flow chart

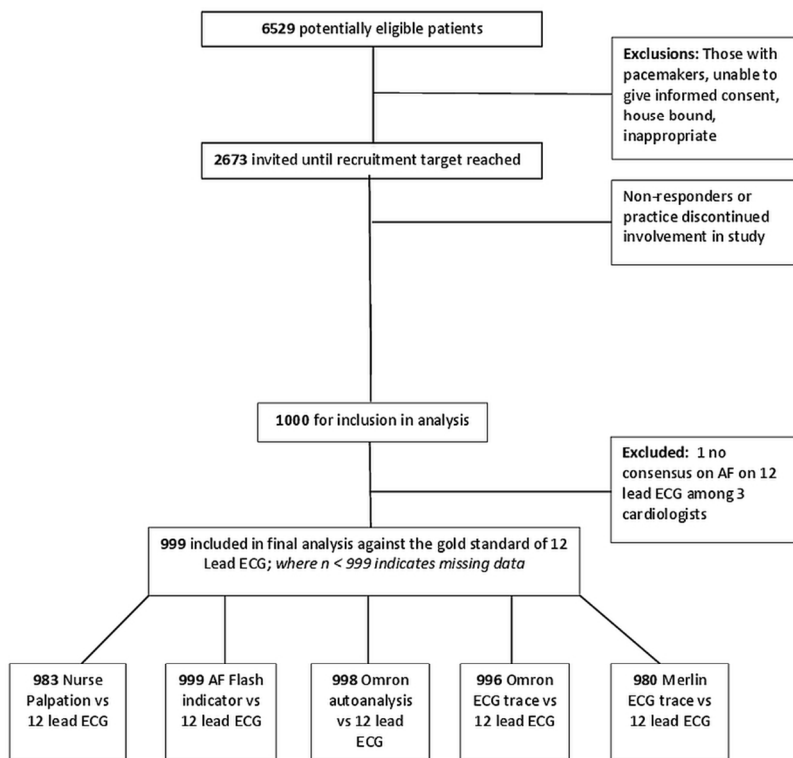

90x116mm (300 x 300 DPI)

1  
2  
3  
4  
5  
6  
7  
8  
9  
10  
11  
12  
13  
14  
15  
16  
17  
18  
19  
20  
21  
22  
23  
24  
25  
26  
27  
28  
29  
30  
31  
32  
33  
34  
35  
36  
37  
38  
39  
40  
41  
42  
43  
44  
45  
46  
47  
48  
49  
50  
51  
52  
53  
54  
55  
56  
57  
58  
59  
60

Figure 2: Predictive value of WatchBP and Omron autoanalysis for detecting AF

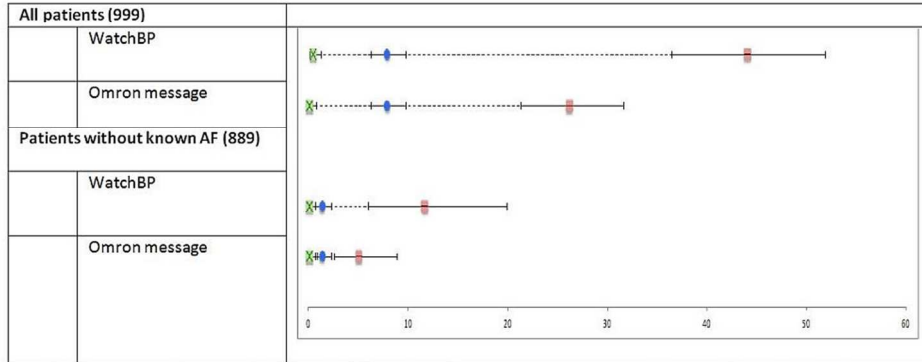

Blue dots = prevalence; red dots: probability of AF after a positive test; green dots: probability of AF after a negative test (each with their 95% CI)

90x47mm (300 x 300 DPI)

For review only



1  
2  
3  
4  
5  
6  
7  
8  
9  
10  
11  
12  
13  
14  
15  
16  
17  
18  
19  
20  
21  
22  
23  
24  
25  
26  
27  
28  
29  
30  
31  
32  
33  
34  
35  
36  
37  
38  
39  
40  
41  
42  
43  
44  
45  
46  
47  
48  
49  
50  
51  
52  
53  
54  
55  
56  
57  
58  
59  
60

**OMRON**

| Study          | TP | FP  | FN | TN  | Sensitivity (95% CI) | Specificity (95% CI) | Sensitivity (95% CI) | Specificity (95% CI) |
|----------------|----|-----|----|-----|----------------------|----------------------|----------------------|----------------------|
| Cardiologist 1 | 35 | 110 | 2  | 332 | 0.95 [0.82, 0.99]    | 0.75 [0.71, 0.79]    |                      |                      |
| Cardiologist 2 | 35 | 10  | 2  | 432 | 0.95 [0.82, 0.99]    | 0.98 [0.96, 0.99]    |                      |                      |
| Cardiologist 3 | 38 | 12  | 4  | 463 | 0.90 [0.77, 0.97]    | 0.97 [0.96, 0.99]    |                      |                      |
| Cardiologist 4 | 41 | 25  | 1  | 450 | 0.98 [0.87, 1.00]    | 0.95 [0.92, 0.97]    |                      |                      |

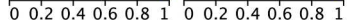

**MERLIN**

| Study          | TP | FP  | FN | TN  | Sensitivity (95% CI) | Specificity (95% CI) | Sensitivity (95% CI) | Specificity (95% CI) |
|----------------|----|-----|----|-----|----------------------|----------------------|----------------------|----------------------|
| Cardiologist 1 | 34 | 105 | 1  | 326 | 0.97 [0.85, 1.00]    | 0.76 [0.71, 0.80]    |                      |                      |
| Cardiologist 2 | 32 | 21  | 3  | 410 | 0.91 [0.77, 0.98]    | 0.95 [0.93, 0.97]    |                      |                      |
| Cardiologist 3 | 41 | 40  | 1  | 432 | 0.98 [0.87, 1.00]    | 0.92 [0.89, 0.94]    |                      |                      |
| Cardiologist 4 | 37 | 41  | 5  | 431 | 0.88 [0.74, 0.96]    | 0.91 [0.88, 0.94]    |                      |                      |

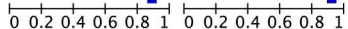

195x80mm (300 x 300 DPI)

Peer review only
